# Supplementary material
Source: PubMed Central journal article supplement (PMC5862774)
Supplement: NIHMS904346-supplement-Supplementary_Materials.pdf [file NIHMS904346-supplement-Supplementary_Materials.pdf]

# Web-based Supplementary Materials for Empirical Null Estimation using Zero-inflated Discrete Mixture Distributions and its Application to Protein Domain Data by Iris Ivy Gauran, Junyong Park, Johan Lim, DoHwan Park, John Zylstra, Thomas Peterson, Maricel Kann and John Spouge

## Web Appendix A: EM Algorithm

Suppose the sample space of  $X$ , denoted by  $\mathcal{X}$ , is partitioned into  $K + 1$  mutually exclusive subsets  $\mathcal{X}_j = \{j\}$ ,  $j \in \mathcal{A}$ , where independent observations are made on  $X$ . Since the information contained in  $\mathbf{x}_j$  is analogous to knowing  $n_j$ , for any  $j \leq C$ , then another, equivalent format of the data set  $\mathbf{x}'_n = (\mathbf{x}'_0, \mathbf{x}'_1, \dots, \mathbf{x}'_C)$  is  $\mathbf{y}_n = (n_0, n_1, \dots, n_C)'$ . After choosing a suitable value for  $C$ , the null sample  $\mathbf{x}'_n$  and the corresponding vector of mutation counts  $\mathbf{y}_n$  are available for the estimation of the parameters of  $f_0$ . However, the problem that arises is that the number of observations  $n_j$  falling in  $\mathcal{X}_j$ ,  $j > C$  are not available for the subsequent estimation of the parameters of  $f_0$ .

For the  $n$  observations in  $\mathbf{x}'_n$ , it is assumed that  $\mathbf{y}_n = (n_0, n_1, \dots, n_C)'$  has a Multinomial distribution consisting of  $n$  draws on  $C + 1$  categories with probabilities  $p_j$

$$p_j = \frac{f_0(j; \Theta)}{\sum_{j=0}^C f_0(j; \Theta)} \quad (1)$$

where  $\Theta = (\eta, \lambda, \theta)$ ,  $\sum_{j=0}^C p_j = 1$  and  $\sum_{j=0}^C n_j = n$ . This gives the likelihood function

$$L_0(\Theta; \mathbf{y}_n) = \frac{n!}{n_0! n_1! \dots n_C!} \prod_{j=0}^C p_j^{n_j} \quad (2)$$

From (2), we can solve the likelihood equation  $\partial L_0(\Theta; \mathbf{y}_n) / \partial \Theta = \mathbf{0}$ . The EM machinery is invoked by defining  $\mathbf{w}_N = (\mathbf{y}'_n, \mathbf{y}'_{N-n})'$  as the complete-data vector where  $\mathbf{y}_{N-n} = (n_{C+1}, n_{C+2}, \dots, n_K)'$ . Then,

instead of looking at the log likelihood for  $\mathbf{y}_n$ , we consider the log likelihood function of the complete data,  $\ell(\eta, \lambda, \theta \mid \mathbf{w}_N)$ . In order to find the estimates, it is important to note that each entry of  $\mathbf{y}_{N-n}$  is a realization of a hidden random variable. However, since these realizations do not exist in reality, we have to consider each entry of  $\mathbf{y}_{N-n}$  as a random variable itself.

Furthermore, McLachlan and Jones (1988) proposed an extension of the complete-data vector  $\mathbf{w}_N$  for mixture densities to include the zero-one indicator variables  $\mathbf{z}_{jk} = (z_{0jk}, z_{1jk})'$   $j = 0, 1, \dots, K$ ;  $k = 1, 2, \dots, n_j$  where  $z_{0jk} + z_{1jk} = 1$  and given the number of mutations  $j$ ,  $\mathbf{z}_{jk}$  are conditionally independent. Conditional on the value of  $j$ , the probability of membership to a component can be computed using Bayes' Theorem as

$$\tau_{0j}(\Theta) = P(z_{0jk} = 1 \mid j) = \frac{\eta I_{\{0\}}(j)}{f_0(j)}$$

and  $\tau_{1j}(\Theta) = P(z_{1jk} = 1 \mid j) = 1 - P(z_{0jk} = 1 \mid j)$ . The indicator function  $I_S(j)$  is equal to 1 if  $j \in S$  and 0 otherwise. Using these indicator variables in the complete-data specification, the log likelihood becomes

$$\sum_{j=0}^K \sum_{k=1}^{n_j} z_{0jk} \log \eta I_{\{0\}}(j) + \sum_{j=0}^K \sum_{k=1}^{n_j} z_{1jk} \log [(1 - \eta)g(j)] \quad (3)$$

### E- Step:

At the  $(p + 1)$ th stage, the expectation  $Q(\Theta; \Theta^{(p)})$  of the log-likelihood of the complete data specified in (3) can be computed conditional on the observed data  $\mathbf{y}_n$  and the current fit  $\Theta^{(p)}$  for  $\Theta$ .

$$\begin{aligned} Q(\Theta; \Theta^{(p)}) &= n_0 \tau_{00}(\Theta^{(p)}) \log \eta + \sum_{j=0}^C n_j \tau_{1j}(\Theta^{(p)}) \log(1 - \eta) + \sum_{j=0}^C n p_j(\Theta^{(p)}) \tau_{1j}(\Theta^{(p)}) \log(1 - \eta) \\ &\quad + (\log \lambda - \lambda) \sum_{j=0}^C n_j \tau_{1j}(\Theta^{(p)}) + (\log \lambda - \lambda) \sum_{j=C+1}^K n p_j(\Theta^{(p)}) \tau_{1j}(\Theta^{(p)}) \\ &\quad + \sum_{j=0}^C n_j (j - 1) \tau_{1j}(\Theta^{(p)}) \log(\lambda + \theta j) + \sum_{j=C+1}^K n (j - 1) p_j(\Theta^{(p)}) \tau_{1j}(\Theta^{(p)}) \log(\lambda + \theta j) \\ &\quad - \left[ \theta \sum_{j=0}^C j n_j \tau_{1j}(\Theta^{(p)}) + \theta \sum_{j=C+1}^K j n p_j(\Theta^{(p)}) \tau_{1j}(\Theta^{(p)}) + constant \right] \end{aligned}$$

### M- Step:

In order to arrive at an estimate of  $\Theta^{(p+1)}$  at the  $(p+1)$ th stage, the goal is to maximize  $Q(\Theta; \Theta^{(p)})$  with respect to  $\Theta$ . The estimates of  $\eta$ ,  $\lambda$  and  $\theta$  obtained at the  $(p+1)$ th stage are as follows:

$$\begin{aligned}\eta^{(p+1)} &= \frac{n_0\tau_{00}(\Theta^{(p)})}{n_0\tau_{00}(\Theta^{(p)}) + \sum_{j=0}^C n_j\tau_{1j}(\Theta^{(p)}) + \sum_{j=C+1}^K np_j(\Theta^{(p)})\tau_{1j}(\Theta^{(p)})} \\ \lambda^{(p+1)} &= \frac{\sum_{j=0}^C n_j[\tau_{1j}(\Theta^{(p)}) + (j-1)\tau_{2j}(\Theta^{(p)})] + \sum_{j=C+1}^K np_j(\Theta^{(p)})[\tau_{1j}(\Theta^{(p)}) + (j-1)\tau_{2j}(\Theta^{(p)})]}{\sum_{j=0}^C n_j\tau_{1j}(\Theta^{(p)}) + \sum_{j=C+1}^K np_j(\Theta^{(p)})\tau_{1j}(\Theta^{(p)})} \\ \theta^{(p+1)} &= \frac{\sum_{j=0}^C n_j(j-1)\tau_{3j}(\Theta^{(p)}) + \sum_{j=C+1}^K np_j(j-1)\tau_{3j}(\Theta^{(p)})}{\sum_{j=0}^C jn_j\tau_{1j}(\Theta^{(p)}) + \sum_{j=C+1}^K jnp_j(\Theta^{(p)})\tau_{1j}(\Theta^{(p)})}\end{aligned}$$

where  $\tau_{2j}(\Theta^{(p)}) = \frac{\lambda^{(p)}}{\lambda^{(p)} + \theta^{(p)}j}$  and  $\tau_{3j}(\Theta^{(p)}) = \frac{\theta^{(p)}j}{\lambda^{(p)} + \theta^{(p)}j}$ .

If the null distribution is modeled using Zero-Inflated Poisson distribution then the log likelihood  $\ell(\eta, \lambda \mid \mathbf{x}_N)$  of the entire data vector is

$$n_0 \log \left( \eta + (1 - \eta)e^{-\lambda} \right) + \sum_{j=1}^C n_j \log(1 - \eta) \frac{\lambda^j e^{-\lambda}}{j!} + \sum_{j=C+1}^K n_j \log f(j; \cdot)$$

Following the same procedure, the  $E$ -Step at the  $(p+1)$ th stage would yield

$$\begin{aligned}Q(\Theta; \Theta^{(p)}) &= n_0\tau_{00}(\Theta^{(p)}) \log \eta + \sum_{j=0}^C n_j\tau_{1j}(\Theta^{(p)}) \log(1 - \eta) + \sum_{j=0}^C np_j(\Theta^{(p)})\tau_{1j}(\Theta^{(p)}) \log(1 - \eta) \\ &\quad + \log \lambda \sum_{j=0}^C jn_j\tau_{1j}(\Theta^{(p)}) + \log \lambda \sum_{j=C+1}^K jnp_j(\Theta^{(p)})\tau_{1j}(\Theta^{(p)}) \\ &\quad - \left[ \lambda \sum_{j=0}^C n_j\tau_{1j}(\Theta^{(p)}) + \lambda \sum_{j=C+1}^K np_j(\Theta^{(p)})\tau_{1j}(\Theta^{(p)}) + constant \right]\end{aligned}$$

For the  $M$ -Step, the estimates of  $\eta$  and  $\lambda$  obtained at the  $(p + 1)$ th stage are as follows:

$$\eta^{(p+1)} = \frac{n_0 \tau_{00}(\Theta^{(p)})}{n_0 \tau_{00}(\Theta^{(p)}) + \sum_{j=0}^C n_j \tau_{1j}(\Theta^{(p)}) + \sum_{j=C+1}^K n p_j(\Theta^{(p)}) \tau_{1j}(\Theta^{(p)})}$$

$$\lambda^{(p+1)} = \frac{\sum_{j=0}^C j n_j \tau_{1j}(\Theta^{(p)}) + \sum_{j=C+1}^K j n p_j(\Theta^{(p)}) \tau_{1j}(\Theta^{(p)})}{\sum_{j=0}^C n_j \tau_{1j}(\Theta^{(p)}) + \sum_{j=C+1}^K n p_j(\Theta^{(p)}) \tau_{1j}(\Theta^{(p)})}$$

If the null distribution is modeled using Generalized Poisson distribution then the log likelihood  $\ell(\lambda, \theta | \mathbf{x}_N)$  of the entire data is

$$\sum_{j=0}^C n_j \log \left( \frac{\lambda(\lambda + \theta j)^{j-1} e^{-\lambda - \theta j}}{j!} \right) + \sum_{j=C+1}^K n_j \log f(j; \cdot)$$

Unlike ZIGP, this model is not a mixture density so the procedure does not require the inclusion of latent variables. The  $E$ -Step would yield

$$Q(\Theta; \Theta^{(p)}) = (\log \lambda - \lambda) \sum_{j=0}^C n_j + (\log \lambda - \lambda) \sum_{j=C+1}^K n p_j(\Theta^{(p)}) + \sum_{j=0}^C n_j (j - 1) \log(\lambda + \theta j)$$

$$+ \sum_{j=C+1}^K n (j - 1) p_j(\Theta^{(p)}) \log(\lambda + \theta j) - \left[ \theta \sum_{j=0}^C j n_j + \theta \sum_{j=C+1}^K j n p_j(\Theta^{(p)}) + constant \right]$$

At the  $(p + 1)$ th stage, the  $M$ -Step would yield the estimates of  $\lambda$  and  $\theta$  as follows:

$$\lambda^{(p+1)} = \frac{\sum_{j=0}^C n_j [1 + (j - 1) \tau_{2j}(\Theta^{(p)})] + \sum_{j=C+1}^K n p_j(\Theta^{(p)}) [1 + (j - 1) \tau_{2j}(\Theta^{(p)})]}{\sum_{j=0}^C n_j + \sum_{j=C+1}^K n p_j(\Theta^{(p)})}$$

$$\theta^{(p+1)} = \frac{\sum_{j=0}^C n_j (j - 1) \tau_{3j}(\Theta^{(p)}) + \sum_{j=C+1}^K n (j - 1) p_j(\Theta^{(p)}) \tau_{3j}(\Theta^{(p)})}{\sum_{j=0}^C j n_j + \sum_{j=C+1}^K j n p_j(\Theta^{(p)})}$$

Lastly, if  $f_0$  is modeled using Poisson distribution then the log likelihood  $\ell(\lambda \mid \mathbf{x}_N)$  of the entire data vector is

$$\sum_{j=0}^C n_j \log \left( \frac{\lambda^j e^{-\lambda}}{j!} \right) + \sum_{j=C+1}^K n_j \log f(j; \cdot)$$

Since this model is also not a mixture density then the procedure does not require the inclusion of zero-one indicator variables. The  $E$ -Step would yield

$$\begin{aligned} Q(\Theta; \Theta^{(p)}) &= \log \lambda \sum_{j=0}^C j n_j + \log \lambda \sum_{j=C+1}^K j n p_j(\Theta^{(p)}) \\ &\quad - \left[ \lambda \sum_{j=0}^C n_j + \lambda \sum_{j=C+1}^K n p_j + \text{constant} \right] \end{aligned}$$

The  $M$ -Step would yield the estimate of  $\lambda$  at the  $(p+1)$ th stage as follows:

$$\lambda^{(p+1)} = \frac{\sum_{j=0}^C j n_j + \sum_{j=C+1}^K j n p_j(\Theta^{(p)})}{\sum_{j=0}^C n_j + \sum_{j=C+1}^K n p_j(\Theta^{(p)})}$$

### Initial Values:

The starting values for  $\eta$ ,  $\lambda$  and  $\theta$  are based on the moments of the data  $\mathbf{a} = (a_1, a_2, \dots, a_N)$ . Suppose the mean of the entire data set is  $\mu_a = \frac{1}{N} \sum_{i=1}^N a_i$  and the variance is  $\sigma_a^2 = \frac{1}{N-1} \sum_{i=1}^N (a_i - \mu_a)^2$ . Also, define  $\mathcal{C}_0 = \{a_i \in \mathbf{a} : a_i = 0\}$ ,  $\mathcal{C}_1 = \{a_i \in \mathbf{a} : 0 < a_i \leq Q_2\}$ ,  $\mathcal{C}_2 = \{a_i \in \mathbf{a} : 0 \leq a_i \leq Q_3\}$ , where  $Q_2$  and  $Q_3$  refers to the second and the third quartile, respectively. Furthermore, define  $\mu_a^{(p)}$  and  $\sigma_a^{(p)}$  as the mean and standard deviation of the set  $\mathcal{C}_p$ ,  $p = 0, 1, 2$ . The initial values for each of the model for  $f_0$  are presented as follows:

1. **Poisson:**  $\lambda^{(0)} = \frac{1}{N} \sum_{i=1}^N a_i I(a_i > 0)$
2. **Generalized Poisson:**  $\theta^{(0)} = 1 - \frac{\sqrt{\mu_a^{(1)}}}{\sigma_a^{(1)}}$  and  $\lambda^{(0)} = \mu_a^{(1)} \frac{\sqrt{\mu_a^{(1)}}}{\sigma_a^{(1)}}$
3. **Zero-inflated Poisson:**  $\eta^{(0)} = \mu_a^{(0)}$  and  $\lambda^{(0)} = \frac{\mu_a}{1 - \mu_a^{(0)}}$

4. **Zero-inflated Generalized Poisson:**  $\eta^{(0)} = \mu_a^{(0)}$ ,  $\theta^{(0)} = 1 - \frac{1}{\sqrt{\frac{[\sigma_a^{(2)}]^2}{\mu_a^{(2)}} - \left(\frac{\mu_a^{(0)}}{1 - \mu_a^{(0)}}\right) \mu_a^{(2)}}}$  and

$$\lambda^{(0)} = \frac{\mu_a^{(2)}}{(1 - \mu_a^{(0)}) \sqrt{\frac{[\sigma_a^{(2)}]^2}{\mu_a^{(2)}} - \left(\frac{\mu_a^{(0)}}{1 - \mu_a^{(0)}}\right) \mu_a^{(2)}}}$$

When  $f_0$  is assumed to be ZIGP, the EM Algorithm takes around 2 seconds, for a given data set. This is the slowest among the four models since it requires estimation of three parameters. The procedure stops when

$$\max\{|\eta^{(k+1)} - \eta^{(k)}|, |\lambda^{(k+1)} - \lambda^{(k)}|, |\theta^{(k+1)} - \theta^{(k)}|\} < 0.0001 = \epsilon$$

## Web Appendix B: Calculation of $D_N$

When we have observations  $a_i$  for  $1 \leq i \leq N$  generated from the null distribution, we are interested in figuring out  $D_N$  such that

$$P\left(\max_{1 \leq i \leq N} a_i < D_N\right) \rightarrow 1 \quad (4)$$

as  $N \rightarrow \infty$ . Once a sequence  $D_N$  is identified,  $a_i (\geq D_N)$  is hardly observed under the null hypothesis, so the corresponding null hypothesis is rejected directly rather than making decision based on local FDR procedure. There are many choices of  $D_N$ , but a smaller sequence of  $D_N$  satisfying (4) is of our interest since any sequence  $B_N$  satisfying  $B_N > D_N$  also satisfies the property.

When  $a_i$  is observed from Generalized Poisson distribution, Klar (2000) showed that the tail probabilities satisfy the following inequality:

$$P(a_i \geq D_N) < \left[1 - e^{1-\theta} \left(\theta + \frac{\lambda}{D_N + 1}\right)\right]^{-1} \frac{\lambda(\lambda + \theta D_N)^{D_N - 1}}{(D_N)^{D_N + 1/2}} e^{-\lambda - (\theta - 1)D_N} \quad (5)$$

where  $D_N \geq \frac{\lambda}{e^{\theta-1} - \theta}$ ,  $\theta \in (0, 1)$ ,  $\lambda > 0$ . Using (5), we can compute for

$$\begin{aligned} P\left(\max_{1 \leq i \leq N} a_i \geq D_N\right) &= 1 - [1 - P(a_i \geq D_N)]^N \\ &\leq 1 - \left[1 - (\delta_{D_N})^{-1} \frac{\lambda(\lambda + \theta D_N)^{D_N-1}}{(D_N)^{D_N+1/2}} e^{-\lambda - (\theta-1)D_N}\right]^N \end{aligned}$$

where  $\delta_{D_N} = 1 - e^{1-\theta} \left(\theta + \frac{\lambda}{D_N + 1}\right)$ . For (4) to hold,

$$\log N - \log \delta_{D_N} + \log \left(\frac{\lambda(\lambda + \theta D_N)^{D_N-1}}{(D_N)^{D_N+1/2}} e^{-\lambda - (\theta-1)D_N}\right) \rightarrow -\infty \quad (6)$$

and (6) can be simplified in terms of  $N$  and  $D_N$  as

$$\mathcal{G}_N \equiv \log N - 0.5 \log D_N - \log(D_N + 1) + D_N \log \left(\theta + \frac{\lambda}{D_N}\right) - (\theta - 1)D_N$$

leading to

$$\mathcal{G}_N \asymp \log N + (\log \theta - \theta + 1)D_N. \quad (7)$$

To assure that  $\mathcal{G}_N \rightarrow -\infty$ , we can take  $D_N = \zeta \log N$  for some constant  $\zeta$  satisfying

$$\zeta > \frac{1}{\theta - 1 - \log \theta}$$

Since  $\log \theta \leq \theta - 1$ , then  $\zeta > 0$ ,  $\theta \in (0, 1)$  as desired. Hence, we take

$$D_N = \left\lceil \max \left( \frac{\lambda}{e^{\theta-1} - \theta}, \frac{\log N}{\theta - 1 - \log \theta} \right) \right\rceil \quad (8)$$

where  $\lceil x \rceil$  is the smallest integer greater than or equal to  $x$  ( $x > 0$ ). Meanwhile, if  $a_i$  is observed from Poisson distribution, Mitzenmacher and Upfal (2005) derived the bounds for the tail probabilities using the Chernoff bound argument:

$$P(a_i \geq D_N) < \frac{e^{-\lambda}(e\lambda)^{D_N}}{(D_N)^{D_N}} \quad (9)$$

where  $0 < \lambda < D_N$ . Using the inequality in (9),

$$P\left(\max_{1 \leq i \leq N} a_i \geq D_N\right) \leq 1 - \left(1 - \frac{e^{-\lambda}(e\lambda)^{D_N}}{(D_N)^{D_N}}\right)^N$$

and in order to satisfy the condition in  $P\left(\max_{1 \leq i \leq N} a_i < D_N\right) \rightarrow 1, \mathcal{P}_N \rightarrow -\infty$  where

$$\mathcal{P}_N \asymp \log N - D_N \log D_N$$

Therefore, we take

$$D_N = \lceil \max(\lambda, \log N) \rceil \tag{10}$$

When  $a_i$  is observed from ZIGP,  $D_N$  can be calculated exactly as shown in (8) since the derivation will eventually yield the leading terms in (7) which does not involve  $\eta$ . Similarly, if  $a_i$  is observed from ZIP,  $D_N$  can be computed using (10).



## Web Tables

Using the model specifications in terms of the true  $f_0$  and  $f_1$ , there are 15 mixture models considered for data generation. Following the key assumption on  $f_0$ , the support of  $f_1$  does not contain values in  $[0, C]$ . Hence,  $f_1$  can be expressed as  $f_1 = C + 1 + W$  where  $W$  follows another count model. The model specifications are presented in Table 1.

Table 1: Model Specification of  $f_0$  and  $f_1$  for data generation and numerical comparison

| True $f_0$ | $W$       | Label             | Parameters for $f_0$ |           |          |         |
|------------|-----------|-------------------|----------------------|-----------|----------|---------|
|            |           |                   | $\eta$               | $\lambda$ | $\theta$ | $\pi_0$ |
| ZIGP       | Geometric | ZIGP <sub>1</sub> | 0.8                  | 1.5       | 0.3      | 0.8     |
|            |           | ZIGP <sub>2</sub> | 0.8                  | 3         | 0.3      | 0.8     |
| ZIP        |           | ZIP <sub>1</sub>  | 0.8                  | 1.5       | 0        | 0.8     |
| ZIGP       | Binomial  | ZIGP <sub>3</sub> | 0.4                  | 1         | 0.3      | 0.35    |
|            |           | ZIGP <sub>4</sub> | 0.4                  | 4         | 0.3      | 0.35    |
| ZIP        |           | ZIP <sub>2</sub>  | 0.4                  | 1.5       | 0        | 0.35    |
| ZIGP       | Geometric | ZIGP <sub>5</sub> | 0.4                  | 1         | 0.15     | 0.85    |
|            |           | ZIGP <sub>6</sub> | 0.4                  | 3         | 0.15     | 0.85    |
| ZIP        |           | ZIP <sub>3</sub>  | 0.4                  | 1.5       | 0        | 0.85    |
| ZIGP       | Binomial  | ZIGP <sub>7</sub> | 0.4                  | 1         | 0.2      | 0.8     |
|            |           | ZIGP <sub>8</sub> | 0.4                  | 3         | 0.2      | 0.8     |
| ZIP        |           | ZIP <sub>4</sub>  | 0.4                  | 1.5       | 0        | 0.8     |

For each of the model specification of  $f_0$ ,  $\hat{C}$  is calculated and the corresponding set of parameter estimates  $\hat{\Theta}_{\hat{C}}^* = (\hat{\eta}_{\hat{C}}, \hat{\lambda}_{\hat{C}}, \hat{\theta}_{\hat{C}}, \hat{\pi}_{0,\hat{C}})$  from EM Algorithm are obtained. The bias of the parameter estimates for each of these specifications are presented in Tables 2 to 6.

It can be seen that regardless of the true null distribution, if  $f_0$  is modeled using the Zero-inflated Generalized Poisson (ZIGP) distribution, then  $\hat{C}$  produces the most accurate estimate for  $C$  in terms of the bias and standard error. This validates the robustness of ZIGP as a model for  $f_0$ , that is, even if the true null distribution is Zero-inflated Poisson (ZIP), the most accurate estimate of  $\hat{C}$  can still be observed when  $f_0$  is modeled using ZIGP.

Table 2: Bias of Parameter Estimates when  $f_1$  is shifted Geometric( $p = 0.08$ ),  $\pi_0 = 0.80$  and  $C = 5$ . ZIP<sub>1</sub>( $\eta = 0.80, \lambda = 1.5$ ) represents the well-separated case, ZIGP<sub>1</sub>( $\eta = 0.80, \lambda = 1.5, \theta = 0.3$ ) represents the moderately mixed case, and ZIGP<sub>2</sub>( $\eta = 0.80, \lambda = 3, \theta = 0.3$ ) represents the heavily mixed case. The number in (·) represents the standard error.

| True $f_0$        | Choice of $C$     | Model for $f_0$ | Bias of Parameter Estimates |                           |                          |                         |                     |                 |
|-------------------|-------------------|-----------------|-----------------------------|---------------------------|--------------------------|-------------------------|---------------------|-----------------|
|                   |                   |                 | $\hat{\eta}_{\hat{C}}$      | $\hat{\lambda}_{\hat{C}}$ | $\hat{\theta}_{\hat{C}}$ | $\hat{\pi}_{0,\hat{C}}$ | $\hat{C}$           |                 |
| ZIP <sub>1</sub>  | $\hat{C}_1$       | ZIGP            | 0.0135<br>(0.0156)          | 0.3006<br>(0.1040)        | 0.0005<br>(0.0004)       | 0.0008<br>(0.0129)      | -0.07<br>(0.27)     |                 |
|                   |                   | ZIP             | -0.0010<br>(0.0193)         | -0.1063<br>(0.2044)       | NA                       | -0.0046<br>(0.0146)     | -1.53<br>(1.17)     |                 |
|                   |                   | GP              | NA                          | -0.1420<br>(0.0316)       | 0.8775<br>(0.0307)       | 0.1998<br>(0.0049)      | 10.54<br>(3.75)     |                 |
|                   |                   | P               | NA                          | -1.3666<br>(0.0459)       | NA                       | -0.0466<br>(0.0209)     | -3.42<br>(0.49)     |                 |
|                   | $\hat{C}_2$       | ZIGP            | 0.0058<br>(0.0176)          | 0.5220<br>(0.1665)        | 0.0033<br>(0.0070)       | 0.0132<br>(0.0178)      | -1.90<br>(0.45)     |                 |
|                   |                   | ZIP             | -0.0035<br>(0.0197)         | 0.0134<br>(0.3089)        | NA                       | 0.0020<br>(0.0194)      | -2.99<br>(0.09)     |                 |
|                   |                   | GP              | NA                          | -0.0317<br>(0.0458)       | 0.8679<br>(0.0306)       | 0.1998<br>(0.0048)      | 1.64<br>(0.83)      |                 |
|                   |                   | P               | NA                          | -1.3666<br>(0.0459)       | NA                       | -0.0466<br>(0.0209)     | -3.42<br>(0.49)     |                 |
|                   | ZIGP <sub>1</sub> | $\hat{C}_1$     | ZIGP                        | 0.0332<br>(0.0262)        | 0.6883<br>(0.1876)       | -0.2633<br>(0.1252)     | -0.0057<br>(0.0254) | -0.57<br>(0.65) |
|                   |                   |                 | ZIP                         | 0.0408<br>(0.0175)        | 0.0296<br>(0.3177)       | NA                      | -0.0290<br>(0.0163) | -2.45<br>(0.72) |
|                   |                   |                 | GP                          | NA                        | -0.1168<br>(0.0319)      | 0.5774<br>(0.0130)      | 0.2000<br>(0.0000)  | 10.65<br>(3.62) |
|                   |                   |                 | P                           | NA                        | -1.3823<br>(0.0328)      | NA                      | -0.0603<br>(0.0172) | -3.23<br>(0.42) |
| $\hat{C}_2$       |                   | ZIGP            | 0.0245<br>(0.0445)          | 0.7423<br>(0.2565)        | -0.2361<br>(0.1764)      | 0.0039<br>(0.0470)      | -1.13<br>(0.66)     |                 |
|                   |                   | ZIP             | 0.0388<br>(0.0189)          | 0.0806<br>(0.3802)        | NA                       | -0.0262<br>(0.0198)     | -3.00<br>(0.06)     |                 |
|                   |                   | GP              | NA                          | 0.0248<br>(0.0507)        | 0.5647<br>(0.0141)       | 0.2000                  | 0.97<br>(0.81)      |                 |
|                   |                   | P               | NA                          | -1.3823<br>(0.0328)       | NA                       | -0.0603<br>(0.0172)     | -3.23<br>(0.42)     |                 |
| ZIGP <sub>2</sub> |                   | $\hat{C}_1$     | ZIGP                        | -0.1006<br>(0.0982)       | 0.6798<br>(0.5178)       | 0.1591<br>(0.2674)      | 0.1076<br>(0.0915)  | 0.25<br>(0.93)  |
|                   |                   |                 | ZIP                         | 0.0710<br>(0.0274)        | -0.4510<br>(0.5938)      | NA                      | -0.0640<br>(0.0275) | -2.22<br>(0.91) |
|                   |                   |                 | GP                          | NA                        | -1.5446<br>(0.0753)      | 0.5106<br>(0.2194)      | 0.1821<br>(0.0663)  | 8.64<br>(4.67)  |
|                   |                   |                 | P                           | NA                        | -2.9138<br>(0.0247)      | NA                      | -0.1130<br>(0.0160) | -3.11<br>(0.32) |
|                   | $\hat{C}_2$       | ZIGP            | -0.1249<br>(0.1065)         | 0.8171<br>(0.5603)        | 0.1803<br>(0.2557)       | 0.1260<br>(0.0916)      | -1.00<br>(0.88)     |                 |
|                   |                   | ZIP             | 0.0634<br>(0.0372)          | -0.3429<br>(0.6975)       | NA                       | -0.0564<br>(0.0373)     | -2.90<br>(0.31)     |                 |
|                   |                   | GP              | NA                          | -1.3985<br>(0.1097)       | 0.4980<br>(0.2160)       | 0.1821<br>(0.0663)      | -0.09<br>(0.58)     |                 |
|                   |                   | P               | NA                          | -2.9138<br>(0.0247)       | NA                       | -0.1130<br>(0.0160)     | -3.11<br>(0.32)     |                 |

Table 3: Bias of Parameter Estimates when  $f_1$  is shifted Binomial( $n = 250, p = 0.20$ ),  $\pi_0 = 0.35$  and  $C = 5$ . ZIP<sub>2</sub>( $\eta = 0.40, \lambda = 1.5$ ) is the well-separated case, ZIGP<sub>3</sub>( $\eta = 0.40, \lambda = 1, \theta = 0.30$ ) represents the moderately mixed case, and ZIGP<sub>4</sub>( $\eta = 0.40, \lambda = 4, \theta = 0.30$ ) represents the heavily mixed case. The number in (·) represents the standard error.

| True $f_0$        | Choice of $C$     | Model for $f_0$ | Bias of Parameter Estimates |                           |                          |                         |                     |                 |
|-------------------|-------------------|-----------------|-----------------------------|---------------------------|--------------------------|-------------------------|---------------------|-----------------|
|                   |                   |                 | $\hat{\eta}_{\hat{C}}$      | $\hat{\lambda}_{\hat{C}}$ | $\hat{\theta}_{\hat{C}}$ | $\hat{\pi}_{0,\hat{C}}$ | $\hat{C}$           |                 |
| ZIP <sub>2</sub>  | $\hat{C}_1$       | ZIGP            | 0.0400<br>(0.0320)          | 0.3046<br>(0.0904)        | 0.0006<br>(0.0031)       | 0.0090<br>(0.0154)      | 0.01<br>(0.11)      |                 |
|                   |                   | ZIP             | -0.0015<br>(0.0393)         | -0.0015<br>(0.1242)       | NA                       | 0.0077<br>(0.0154)      | -0.02<br>(0.16)     |                 |
|                   |                   | GP              | NA                          | 0.0887<br>(0.0412)        | 0.7257<br>(0.0143)       | 0.1516<br>(0.0220)      | 3.24<br>(0.60)      |                 |
|                   |                   | P               | NA                          | -0.7645<br>(0.1092)       | NA                       | -0.0109<br>(0.0165)     | -2.08<br>(0.83)     |                 |
|                   | $\hat{C}_2$       | ZIGP            | 0.0319<br>(0.0464)          | 0.3385<br>(0.1573)        | 0.0320<br>(0.1301)       | 0.0187<br>(0.0433)      | -0.25<br>(0.46)     |                 |
|                   |                   | ZIP             | -0.0065<br>(0.0412)         | 0.0294<br>(0.2733)        | NA                       | 0.0112<br>(0.0237)      | -3.00<br>(0.00)     |                 |
|                   |                   | GP              | NA                          | 0.1751<br>(0.0718)        | 0.7222<br>(0.0144)       | 0.1861<br>(0.0358)      | 0.00<br>(0.32)      |                 |
|                   |                   | P               | NA                          | -0.8083<br>(0.0836)       | NA                       | -0.0169<br>(0.0151)     | -2.63<br>(0.48)     |                 |
|                   | ZIGP <sub>3</sub> | $\hat{C}_1$     | ZIGP                        | 0.1576<br>(0.0371)        | 0.8973<br>(0.1168)       | -0.2661<br>(0.1174)     | 0.0066<br>(0.0205)  | 0.08<br>(0.33)  |
|                   |                   |                 | ZIP                         | 0.1318<br>(0.0400)        | 0.5296<br>(0.2266)       | NA                      | -0.0009<br>(0.0155) | -0.50<br>(0.67) |
|                   |                   |                 | GP                          | NA                        | 0.5653<br>(0.0403)       | 0.4559<br>(0.0121)      | 0.1608<br>(0.0219)  | 3.03<br>(0.65)  |
|                   |                   |                 | P                           | NA                        | -0.4767<br>(0.0758)      | NA                      | -0.0196<br>(0.0159) | -2.30<br>(0.47) |
| $\hat{C}_2$       |                   | ZIGP            | 0.1025<br>(0.0803)          | 1.0264<br>(0.2468)        | -0.0639<br>(0.2847)      | 0.0498<br>(0.0631)      | -0.47<br>(0.62)     |                 |
|                   |                   | ZIP             | 0.1074<br>(0.0524)          | 0.2151<br>(0.2745)        | NA                       | -0.0134<br>(0.0180)     | -3.00<br>(0.00)     |                 |
|                   |                   | GP              | NA                          | 0.6497<br>(0.0946)        | 0.4479<br>(0.0155)       | 0.1959<br>(0.0431)      | -0.28<br>(0.54)     |                 |
|                   |                   | P               | NA                          | -0.4772<br>(0.0755)       | NA                       | -0.0197<br>(0.0159)     | -2.31<br>(0.46)     |                 |
| ZIGP <sub>4</sub> |                   | $\hat{C}_1$     | ZIGP                        | -0.0799<br>(0.1043)       | 0.5839<br>(0.6536)       | 0.0639<br>(0.1776)      | 0.1396<br>(0.1633)  | 0.75<br>(1.73)  |
|                   |                   |                 | ZIP                         | 0.0172<br>(0.0563)        | 1.1610<br>(0.8908)       | NA                      | 0.0015<br>(0.0561)  | 2.36<br>(1.57)  |
|                   |                   |                 | GP                          | NA                        | -1.7787<br>(0.1203)      | 0.4293<br>(0.0142)      | 0.1350<br>(0.0332)  | 2.30<br>(1.35)  |
|                   |                   |                 | P                           | NA                        | -3.3416<br>(0.1089)      | NA                      | -0.1453<br>(0.0131) | -1.96<br>(0.20) |
|                   | $\hat{C}_2$       | ZIGP            | -0.1610<br>(0.0961)         | 1.0876<br>(0.7925)        | 0.1257<br>(0.1084)       | 0.3081<br>(0.2153)      | -2.36<br>(0.72)     |                 |
|                   |                   | ZIP             | 0.1346<br>(0.0751)          | -0.2583<br>(0.8000)       | NA                       | -0.0768<br>(0.0555)     | -1.97<br>(0.17)     |                 |
|                   |                   | GP              | NA                          | -1.4689<br>(0.1630)       | 0.3949<br>(0.0192)       | 0.2825<br>(0.0762)      | -2.90<br>(0.30)     |                 |
|                   |                   | P               | NA                          | -3.3416<br>(0.1089)       | NA                       | -0.1453<br>(0.0131)     | -1.96<br>(0.20)     |                 |

Table 4: Bias of Parameter Estimates when  $f_1$  is shifted Geometric( $p = 0.08$ ),  $\pi_0 = 0.85$  and  $C = 5$ . ZIP<sub>3</sub>( $\eta = 0.40, \lambda = 1.5$ ) represents the well-separated case, ZIGP<sub>5</sub>( $\eta = 0.40, \lambda = 1, \theta = 0.15$ ) represents the moderately mixed case, and ZIGP<sub>6</sub>( $\eta = 0.40, \lambda = 3, \theta = 0.15$ ) represents the heavily mixed case. The number in (·) represents the standard error.

| True $f_0$        | Choice of $C$     | Model for $f_0$ | Bias of Parameter Estimates |                           |                          |                         |                     |                 |
|-------------------|-------------------|-----------------|-----------------------------|---------------------------|--------------------------|-------------------------|---------------------|-----------------|
|                   |                   |                 | $\hat{\eta}_{\hat{C}}$      | $\hat{\lambda}_{\hat{C}}$ | $\hat{\theta}_{\hat{C}}$ | $\hat{\pi}_{0,\hat{C}}$ | $\hat{C}$           |                 |
| ZIP <sub>3</sub>  | $\hat{C}_1$       | ZIGP            | 0.0399<br>(0.0210)          | 0.2986<br>(0.0553)        | 0.0000<br>(0.0000)       | 0.0023<br>(0.0117)      | 0.06<br>(0.26)      |                 |
|                   |                   | ZIP             | -0.0051<br>(0.0274)         | -0.0583<br>(0.1132)       | NA                       | -0.0079<br>(0.0168)     | -1.33<br>(1.12)     |                 |
|                   |                   | GP              | NA                          | -0.0644<br>(0.0288)       | 0.0000<br>(0.0000)       | 0.0003<br>(0.0117)      | -0.06<br>(0.27)     |                 |
|                   |                   | P               | NA                          | -1.1227<br>(0.0340)       | NA                       | -0.1880<br>(0.0174)     | -4.00<br>(0.00)     |                 |
|                   | $\hat{C}_2$       | ZIGP            | 0.0360<br>(0.0202)          | 0.5099<br>(0.0968)        | 0.0000<br>(0.0000)       | 0.0371<br>(0.0175)      | -1.90<br>(0.31)     |                 |
|                   |                   | ZIP             | -0.0034<br>(0.0269)         | 0.0071<br>(0.1749)        | NA                       | 0.0031<br>(0.0285)      | -3.00<br>(0.03)     |                 |
|                   |                   | GP              | NA                          | -0.0062<br>(0.0474)       | 0.0000<br>(0.0000)       | 0.0175<br>(0.0149)      | -1.68<br>(0.52)     |                 |
|                   |                   | P               | NA                          | -1.1227<br>(0.0340)       | NA                       | -0.1880<br>(0.0174)     | -4.00<br>(0.00)     |                 |
|                   | ZIGP <sub>5</sub> | $\hat{C}_1$     | ZIGP                        | 0.1358<br>(0.0205)        | 0.6784<br>(0.0592)       | -0.1500<br>(0.0000)     | -0.0020<br>(0.0118) | -0.17<br>(0.40) |
|                   |                   |                 | ZIP                         | 0.0602<br>(0.0360)        | 0.1168<br>(0.1364)       | NA                      | -0.0244<br>(0.0167) | -2.46<br>(0.71) |
|                   |                   |                 | GP                          | NA                        | 0.3066<br>(0.0248)       | -0.1500<br>(0.0000)     | -0.0034<br>(0.0118) | -0.35<br>(0.48) |
|                   |                   |                 | P                           | NA                        | -0.6936<br>(0.0269)      | NA                      | -0.1329<br>(0.0166) | -4.00<br>(0.00) |
| $\hat{C}_2$       |                   | ZIGP            | 0.1331<br>(0.0201)          | 0.8139<br>(0.0882)        | -0.1500<br>(0.0000)      | 0.0164<br>(0.0158)      | -1.99<br>(0.18)     |                 |
|                   |                   | ZIP             | 0.0607<br>(0.0362)          | 0.1268<br>(0.1527)        | NA                       | -0.0230<br>(0.0188)     | -3.00<br>(0.00)     |                 |
|                   |                   | GP              | NA                          | 0.3407<br>(0.0391)        | -0.1500<br>(0.0000)      | 0.0065<br>(0.0137)      | -1.62<br>(0.51)     |                 |
|                   |                   | P               | NA                          | -0.6936<br>(0.0269)       | NA                       | -0.1329<br>(0.0166)     | -4.00<br>(0.00)     |                 |
| ZIGP <sub>6</sub> |                   | $\hat{C}_1$     | ZIGP                        | 0.0141<br>(0.0428)        | 0.2415<br>(0.1963)       | -0.0878<br>(0.1014)     | -0.0212<br>(0.0384) | -0.04<br>(0.91) |
|                   |                   |                 | ZIP                         | 0.0650<br>(0.0388)        | -0.1889<br>(0.3495)      | NA                      | -0.1118<br>(0.0621) | -2.01<br>(0.96) |
|                   |                   |                 | GP                          | NA                        | -1.2251<br>(0.0544)      | -0.1500<br>(0.0000)     | -0.1562<br>(0.0186) | -1.99<br>(0.11) |
|                   |                   |                 | P                           | NA                        | -2.8201<br>(0.0233)      | NA                      | -0.4126<br>(0.0156) | -4.00<br>(0.00) |
|                   | $\hat{C}_2$       | ZIGP            | -0.0364<br>(0.0962)         | 0.5027<br>(0.4628)        | 0.0006<br>(0.2183)       | 0.0303<br>(0.0710)      | -1.60<br>(0.51)     |                 |
|                   |                   | ZIP             | 0.0563<br>(0.0511)          | -0.1229<br>(0.4417)       | NA                       | -0.0927<br>(0.0921)     | -2.98<br>(0.14)     |                 |
|                   |                   | GP              | NA                          | -1.0759<br>(0.0599)       | -0.1500<br>(0.0000)      | -0.0975<br>(0.0278)     | -3.00<br>(0.06)     |                 |
|                   |                   | P               | NA                          | -2.8201<br>(0.0233)       | NA                       | -0.4126<br>(0.0156)     | -4.00<br>(0.00)     |                 |

Table 5: Bias of Parameter Estimates when  $f_1$  is shifted Binomial( $n = 250, p = 0.20$ ),  $\pi_0 = 0.80$  and  $C = 5$ . ZIP<sub>4</sub>( $\eta = 0.40, \lambda = 1.5$ ) is the well-separated case, ZIGP<sub>7</sub>( $\eta = 0.40, \lambda = 1, \theta = 0.20$ ) represents the moderately mixed case, and ZIGP<sub>8</sub>( $\eta = 0.40, \lambda = 3, \theta = 0.20$ ) represents the heavily mixed case. The number in (·) represents the standard error.

| True $f_0$        | Choice of $C$     | Model for $f_0$ | Bias of Parameter Estimates |                           |                          |                         |                     |                 |
|-------------------|-------------------|-----------------|-----------------------------|---------------------------|--------------------------|-------------------------|---------------------|-----------------|
|                   |                   |                 | $\hat{\eta}_{\hat{C}}$      | $\hat{\lambda}_{\hat{C}}$ | $\hat{\theta}_{\hat{C}}$ | $\hat{\pi}_{0,\hat{C}}$ | $\hat{C}$           |                 |
| ZIP <sub>4</sub>  | $\hat{C}_1$       | ZIGP            | 0.0390<br>(0.0211)          | 0.2949<br>(0.0569)        | 0.0000<br>(0.0000)       | 0.0079<br>(0.0128)      | 0.44<br>(0.54)      |                 |
|                   |                   | ZIP             | -0.0061<br>(0.0268)         | -0.0605<br>(0.1152)       | NA                       | -0.0016<br>(0.0188)     | -1.12<br>(1.19)     |                 |
|                   |                   | GP              | NA                          | -0.0644<br>(0.0305)       | 0.0000<br>(0.0000)       | 0.0063<br>(0.0128)      | 0.10<br>(0.48)      |                 |
|                   |                   | P               | NA                          | -1.1214<br>(0.0332)       | NA                       | -0.1721<br>(0.0173)     | -4.00<br>(0.00)     |                 |
|                   | $\hat{C}_2$       | ZIGP            | 0.0343<br>(0.0205)          | 0.5281<br>(0.1100)        | 0.0000<br>(0.0000)       | 0.0452<br>(0.0230)      | -1.97<br>(0.25)     |                 |
|                   |                   | ZIP             | -0.0046<br>(0.0264)         | 0.0028<br>(0.1823)        | NA                       | 0.0087<br>(0.0301)      | -3.00<br>(0.00)     |                 |
|                   |                   | GP              | NA                          | 0.0030<br>(0.0466)        | 0.0000<br>(0.0000)       | 0.0253<br>(0.0156)      | -1.79<br>(0.45)     |                 |
|                   |                   | P               | NA                          | -1.1214<br>(0.0332)       | NA                       | -0.1721<br>(0.0173)     | -4.00<br>(0.00)     |                 |
|                   | ZIGP <sub>7</sub> | $\hat{C}_1$     | ZIGP                        | 0.1449<br>(0.0210)        | 0.7476<br>(0.0701)       | -0.1999<br>(0.0003)     | 0.0017<br>(0.0130)  | -0.25<br>(0.53) |
|                   |                   |                 | ZIP                         | 0.0778<br>(0.0357)        | 0.1486<br>(0.1516)       | NA                      | -0.0254<br>(0.0183) | -2.46<br>(0.71) |
|                   |                   |                 | GP                          | NA                        | 0.3272<br>(0.0279)       | -0.2000<br>(0.0000)     | -0.0006<br>(0.0131) | -0.58<br>(0.50) |
|                   |                   |                 | P                           | NA                        | -0.7076<br>(0.0269)      | NA                      | -0.1295<br>(0.0168) | -4.00<br>(0.00) |
| $\hat{C}_2$       |                   | ZIGP            | 0.1387<br>(0.0227)          | 0.8908<br>(0.1557)        | -0.1999<br>(0.0006)      | 0.0228<br>(0.0284)      | -2.09<br>(0.29)     |                 |
|                   |                   | ZIP             | 0.0775<br>(0.0357)          | 0.1487<br>(0.1603)        | NA                       | -0.0253<br>(0.0195)     | -3.00<br>(0.00)     |                 |
|                   |                   | GP              | NA                          | 0.3656<br>(0.0332)        | -0.2000<br>(0.0000)      | 0.0103<br>(0.0145)      | -1.90<br>(0.30)     |                 |
|                   |                   | P               | NA                          | -0.7076<br>(0.0269)       | NA                       | -0.1295<br>(0.0168)     | -4.00<br>(0.00)     |                 |
| ZIGP <sub>8</sub> |                   | $\hat{C}_1$     | ZIGP                        | 0.0187<br>(0.0399)        | 0.2582<br>(0.1978)       | -0.1085<br>(0.1004)     | -0.0177<br>(0.0554) | 0.38<br>(1.11)  |
|                   |                   |                 | ZIP                         | 0.0800<br>(0.0411)        | -0.1840<br>(0.3807)      | NA                      | -0.1206<br>(0.0606) | -1.88<br>(1.05) |
|                   |                   |                 | GP                          | NA                        | -1.2556<br>(0.0526)      | -0.2000<br>(0.0000)     | -0.1630<br>(0.0182) | -1.98<br>(0.13) |
|                   |                   |                 | P                           | NA                        | -2.8292<br>(0.0239)      | NA                      | -0.3900<br>(0.0150) | -4.00<br>(0.00) |
|                   | $\hat{C}_2$       | ZIGP            | -0.0633<br>(0.1009)         | 0.5981<br>(0.4933)        | 0.0469<br>(0.1941)       | 0.0780<br>(0.1143)      | -1.38<br>(0.60)     |                 |
|                   |                   | ZIP             | 0.0752<br>(0.0525)          | -0.1559<br>(0.4576)       | -0.2000                  | -0.1096<br>(0.0882)     | -2.99<br>(0.11)     |                 |
|                   |                   | GP              | NA                          | -1.1042<br>(0.0568)       | -0.2000<br>(0.0000)      | -0.1085<br>(0.0269)     | -3.00<br>(0.04)     |                 |
|                   |                   | P               | NA                          | -2.8292<br>(0.0239)       | NA                       | -0.3900<br>(0.0150)     | -4.00<br>(0.00)     |                 |

Table 6: Numerical Comparison when  $f_1$  is shifted Geometric( $p = 0.08$ ),  $\pi_0 = 0.85$  and  $C = 5$ . ZIP<sub>3</sub>( $\eta = 0.40, \lambda = 1.5$ ) represents the well-separated case, ZIGP<sub>5</sub>( $\eta = 0.40, \lambda = 1, \theta = 0.15$ ) represents the moderately mixed case, and ZIGP<sub>6</sub>( $\eta = 0.40, \lambda = 3, \theta = 0.15$ ) represents the heavily mixed case. The number in (·) represents the standard error.

| True $f_0$        | Choice of $C$     | Model for $f_0$ | Two-Stage Procedure |                           |                           | One-Stage Procedure     |                    |                           | Storey's FDR            |                    |                    |                  |
|-------------------|-------------------|-----------------|---------------------|---------------------------|---------------------------|-------------------------|--------------------|---------------------------|-------------------------|--------------------|--------------------|------------------|
|                   |                   |                 | $R$                 | $\widehat{FDR}$           | $\widehat{TPR}$           | $R$                     | $\widehat{FDR}$    | $\widehat{TPR}$           | $R$                     | $\widehat{FDR}$    | $\widehat{TPR}$    |                  |
| ZIP <sub>3</sub>  | $\hat{C}_1$       | ZIGP            | 152.53<br>(11.78)   | <b>0.0146</b><br>(0.0124) | <b>0.999</b><br>(0.005)   | 135.92<br>(11.31)       | 0.0005<br>(0.0019) | 0.903<br>(0.024)          | 136.04<br>(11.09)       | 0.0005<br>(0.0019) | 0.904<br>(0.023)   |                  |
|                   |                   | ZIP             | 144.50<br>(11.41)   | 0.0029<br>(0.0045)        | 0.958<br>(0.017)          | 142.64<br>(12.07)       | 0.0024<br>(0.0043) | 0.945<br>(0.022)          | 142.02<br>(11.85)       | 0.0022<br>(0.0041) | 0.942<br>(0.031)   |                  |
|                   |                   | GP              | 153.44<br>(12.13)   | 0.0190<br>(0.0206)        | 1.000<br>(0.001)          | 139.19<br>(12.34)       | 0.0014<br>(0.0034) | 0.923<br>(0.029)          | 137.11<br>(11.48)       | 0.0008<br>(0.0025) | 0.910<br>(0.029)   |                  |
|                   |                   | P               | 196.66<br>(29.71)   | 0.2232<br>(0.0908)        | 1.000<br>(0.000)          | 196.66<br>(29.71)       | 0.2232<br>(0.0908) | 1.000<br>(0.000)          | 163.71<br>(15.17)       | 0.0783<br>(0.0484) | 1.000<br>(0.000)   |                  |
|                   | $\hat{C}_2$       | ZIGP            | 152.81<br>(11.77)   | 0.0160<br>(0.0140)        | 0.999<br>(0.007)          | 132.59<br>(12.09)       | 0.0003<br>(0.0016) | 0.880<br>(0.036)          | 131.24<br>(11.81)       | 0.0003<br>(0.0016) | 0.872<br>(0.041)   |                  |
|                   |                   | ZIP             | 144.50<br>(11.41)   | 0.0029<br>(0.0045)        | 0.958<br>(0.017)          | 141.00<br>(12.15)       | 0.0019<br>(0.0040) | 0.935<br>(0.029)          | 140.44<br>(12.04)       | 0.0019<br>(0.0039) | 0.931<br>(0.034)   |                  |
|                   |                   | GP              | 161.41<br>(13.68)   | 0.0664<br>(0.0377)        | 1.000<br>(0.000)          | 137.43<br>(11.76)       | 0.0009<br>(0.0026) | 0.912<br>(0.027)          | 136.39<br>(11.18)       | 0.0006<br>(0.0021) | 0.906<br>(0.026)   |                  |
|                   |                   | P               | 196.66<br>(29.71)   | 0.2232<br>(0.0908)        | 1.000<br>(0.000)          | 196.66<br>(29.71)       | 0.2232<br>(0.0908) | 1.000<br>(0.000)          | 163.71<br>(15.17)       | 0.0783<br>(0.0484) | 1.000<br>(0.000)   |                  |
|                   | ZIGP <sub>5</sub> | $\hat{C}_1$     | ZIGP                | 156.38<br>(12.24)         | <b>0.0374</b><br>(0.0270) | <b>1.000</b><br>(0.001) | 139.25<br>(12.75)  | 0.0064<br>(0.0075)        | 0.919<br>(0.033)        | 135.43<br>(11.37)  | 0.0041<br>(0.0056) | 0.896<br>(0.030) |
|                   |                   |                 | ZIP                 | 151.38<br>(12.60)         | 0.0213<br>(0.0144)        | 0.984<br>(0.023)        | 151.37<br>(12.60)  | 0.0212<br>(0.0144)        | 0.984<br>(0.023)        | 148.69<br>(12.54)  | 0.0167<br>(0.0128) | 0.971<br>(0.029) |
|                   |                   |                 | GP                  | 157.94<br>(12.56)         | 0.0465<br>(0.0312)        | 1.000<br>(0.000)        | 143.92<br>(11.48)  | 0.0094<br>(0.0082)        | 0.947<br>(0.020)        | 144.09<br>(11.48)  | 0.0095<br>(0.0082) | 0.948<br>(0.021) |
|                   |                   |                 | P                   | 190.55<br>(23.90)         | 0.2025<br>(0.0792)        | 1.000<br>(0.000)        | 190.55<br>(23.90)  | 0.2025<br>(0.0792)        | 1.000<br>(0.000)        | 175.68<br>(14.31)  | 0.1420<br>(0.0439) | 1.000<br>(0.000) |
| $\hat{C}_2$       |                   | ZIGP            | 158.91<br>(12.10)   | 0.0529<br>(0.0268)        | 1.000<br>(0.003)          | 135.50<br>(11.73)       | 0.0041<br>(0.0058) | 0.897<br>(0.030)          | 134.51<br>(11.00)       | 0.0036<br>(0.0052) | 0.891<br>(0.026)   |                  |
|                   |                   | ZIP             | 151.31<br>(12.64)   | 0.0213<br>(0.0142)        | 0.984<br>(0.023)          | 151.27<br>(12.68)       | 0.0213<br>(0.0143) | 0.984<br>(0.024)          | 148.73<br>(12.62)       | 0.0169<br>(0.0130) | 0.971<br>(0.029)   |                  |
|                   |                   | GP              | 173.85<br>(15.57)   | 0.1318<br>(0.0552)        | 1.000<br>(0.000)          | 143.25<br>(11.76)       | 0.0091<br>(0.0083) | 0.943<br>(0.024)          | 141.93<br>(12.08)       | 0.0083<br>(0.0081) | 0.935<br>(0.033)   |                  |
|                   |                   | P               | 190.55<br>(23.90)   | 0.2025<br>(0.0792)        | 1.000<br>(0.000)          | 190.55<br>(23.90)       | 0.2025<br>(0.0792) | 1.000<br>(0.000)          | 175.68<br>(14.31)       | 0.1420<br>(0.0439) | 1.000<br>(0.000)   |                  |
| ZIGP <sub>6</sub> |                   | $\hat{C}_1$     | ZIGP                | 128.99<br>(25.92)         | 0.0527<br>(0.0334)        | 0.809<br>(0.145)        | 113.74<br>(23.39)  | <b>0.0214</b><br>(0.0188) | <b>0.796</b><br>(0.141) | 114.12<br>(21.36)  | 0.0208<br>(0.0165) | 0.742<br>(0.126) |
|                   |                   |                 | ZIP                 | 194.97<br>(12.97)         | 0.2547<br>(0.0326)        | 0.966<br>(0.015)        | 142.50<br>(21.61)  | 0.0829<br>(0.0615)        | 0.876<br>(0.054)        | 136.12<br>(15.40)  | 0.0623<br>(0.0381) | 0.846<br>(0.047) |
|                   |                   |                 | GP                  | 290.60<br>(24.60)         | 0.4796<br>(0.0486)        | 1.000<br>(0.000)        | 185.19<br>(19.51)  | 0.2215<br>(0.0576)        | 0.953<br>(0.023)        | 165.50<br>(12.40)  | 0.1571<br>(0.0313) | 0.927<br>(0.022) |
|                   |                   |                 | P                   | 496.39<br>(43.29)         | 0.6950<br>(0.0310)        | 1.000<br>(0.000)        | 496.39<br>(43.29)  | 0.6950<br>(0.0310)        | 1.000<br>(0.000)        | 390.81<br>(35.76)  | 0.6128<br>(0.0362) | 1.000<br>(0.000) |
|                   | $\hat{C}_2$       | ZIGP            | 105.34<br>(50.16)   | 0.0355<br>(0.0302)        | 0.671<br>(0.313)          | 93.46<br>(44.56)        | 0.0142<br>(0.0160) | 0.661<br>(0.308)          | 95.43<br>(41.16)        | 0.0144<br>(0.0150) | 0.625<br>(0.265)   |                  |
|                   |                   | ZIP             | 194.97<br>(12.97)   | 0.2547<br>(0.0326)        | 0.966<br>(0.015)          | 140.94<br>(23.00)       | 0.0804<br>(0.0637) | 0.866<br>(0.067)          | 134.62<br>(16.69)       | 0.0603<br>(0.0399) | 0.838<br>(0.057)   |                  |
|                   |                   | GP              | 242.61<br>(20.34)   | 0.3778<br>(0.0448)        | 1.000<br>(0.000)          | 168.07<br>(14.63)       | 0.1655<br>(0.0400) | 0.931<br>(0.022)          | 152.31<br>(14.42)       | 0.1113<br>(0.0390) | 0.898<br>(0.031)   |                  |
|                   |                   | P               | 496.39<br>(43.29)   | 0.6950<br>(0.0310)        | 1.000<br>(0.000)          | 496.39<br>(43.29)       | 0.6950<br>(0.0310) | 1.000<br>(0.000)          | 390.81<br>(35.76)       | 0.6128<br>(0.0362) | 1.000<br>(0.000)   |                  |

Table 7: Numerical Comparison when  $f_1$  is shifted Binomial( $n = 250, p = 0.20$ ),  $\pi_0 = 0.80$  and  $C = 5$ . ZIP<sub>4</sub>( $\eta = 0.40, \lambda = 1.5$ ) represents the well-separated case, ZIGP<sub>7</sub>( $\eta = 0.40, \lambda = 1, \theta = 0.20$ ) represents the moderately mixed case, and ZIGP<sub>8</sub>( $\eta = 0.40, \lambda = 3, \theta = 0.20$ ) represents the heavily mixed case. The number in (·) represents the standard error.

| True $f_0$        | Choice of $C$     | Model for $f_0$ | Two-Stage Procedure |                           |                           | One-Stage Procedure     |                    |                    | Storey's FDR      |                    |                           |                         |
|-------------------|-------------------|-----------------|---------------------|---------------------------|---------------------------|-------------------------|--------------------|--------------------|-------------------|--------------------|---------------------------|-------------------------|
|                   |                   |                 | $R$                 | $\widehat{FDR}$           | $\widehat{TPR}$           | $R$                     | $\widehat{FDR}$    | $\widehat{TPR}$    | $R$               | $\widehat{FDR}$    | $\widehat{TPR}$           |                         |
| ZIP <sub>4</sub>  | $\hat{C}_1$       | ZIGP            | 195.26<br>(13.05)   | 0.0084<br>(0.0092)        | 0.996<br>(0.006)          | 186.46<br>(12.89)       | 0.0003<br>(0.0013) | 0.958<br>(0.015)   | 189.34<br>(13.02) | 0.0010<br>(0.0025) | 0.973<br>(0.016)          |                         |
|                   |                   | ZIP             | 191.74<br>(12.68)   | 0.0020<br>(0.0034)        | 0.985<br>(0.009)          | 189.08<br>(12.94)       | 0.0010<br>(0.0026) | 0.973<br>(0.012)   | 192.06<br>(12.81) | 0.0027<br>(0.0045) | 0.985<br>(0.010)          |                         |
|                   |                   | GP              | 196.93<br>(13.21)   | 0.0137<br>(0.0165)        | 0.999<br>(0.003)          | 187.58<br>(12.74)       | 0.0004<br>(0.0015) | 0.965<br>(0.014)   | 191.57<br>(12.68) | 0.0019<br>(0.0032) | 0.984<br>(0.010)          |                         |
|                   |                   | P               | 237.12<br>(28.10)   | 0.1730<br>(0.0759)        | 1.000<br>(0.000)          | 237.12<br>(28.10)       | 0.1730<br>(0.0759) | 1.000<br>(0.000)   | 217.12<br>(17.44) | 0.1024<br>(0.0514) | 1.000<br>(0.000)          |                         |
|                   | $\hat{C}_2$       | ZIGP            | 196.41<br>(12.81)   | <b>0.0110</b><br>(0.0092) | <b>0.999</b><br>(0.004)   | 183.31<br>(12.85)       | 0.0001<br>(0.0008) | 0.943<br>(0.018)   | 187.51<br>(12.71) | 0.0004<br>(0.0015) | 0.964<br>(0.015)          |                         |
|                   |                   | ZIP             | 191.74<br>(12.68)   | 0.0020<br>(0.0034)        | 0.985<br>(0.009)          | 188.55<br>(12.99)       | 0.0009<br>(0.0025) | 0.970<br>(0.015)   | 191.63<br>(12.96) | 0.0026<br>(0.0046) | 0.983<br>(0.012)          |                         |
|                   |                   | GP              | 204.55<br>(14.35)   | 0.0492<br>(0.0283)        | 1.000<br>(0.000)          | 187.34<br>(12.67)       | 0.0004<br>(0.0014) | 0.964<br>(0.014)   | 190.94<br>(12.87) | 0.0017<br>(0.0030) | 0.981<br>(0.013)          |                         |
|                   |                   | P               | 237.12<br>(28.10)   | 0.1730<br>(0.0759)        | 1.000<br>(0.000)          | 237.12<br>(28.10)       | 0.1730<br>(0.0759) | 1.000<br>(0.000)   | 217.12<br>(17.44) | 0.1024<br>(0.0514) | 1.000<br>(0.000)          |                         |
|                   | ZIGP <sub>7</sub> | $\hat{C}_1$     | ZIGP                | 203.78<br>(13.86)         | <b>0.0474</b><br>(0.0285) | <b>1.000</b><br>(0.001) | 188.01<br>(12.88)  | 0.0062<br>(0.0060) | 0.963<br>(0.014)  | 192.48<br>(12.99)  | 0.0126<br>(0.0087)        | 0.979<br>(0.013)        |
|                   |                   |                 | ZIP                 | 197.00<br>(13.18)         | 0.0232<br>(0.0153)        | 0.991<br>(0.010)        | 196.85<br>(13.23)  | 0.0229<br>(0.0155) | 0.991<br>(0.010)  | 199.24<br>(12.91)  | 0.0296<br>(0.0152)        | 0.996<br>(0.008)        |
|                   |                   |                 | GP                  | 206.81<br>(13.99)         | 0.0611<br>(0.0291)        | 1.000<br>(0.000)        | 191.02<br>(13.15)  | 0.0103<br>(0.0091) | 0.974<br>(0.013)  | 193.70<br>(12.74)  | 0.0145<br>(0.0086)        | 0.984<br>(0.009)        |
|                   |                   |                 | P                   | 250.24<br>(26.30)         | 0.2186<br>(0.0715)        | 1.000<br>(0.000)        | 250.24<br>(26.30)  | 0.2186<br>(0.0715) | 1.000<br>(0.000)  | 228.55<br>(13.59)  | 0.1509<br>(0.0261)        | 1.000<br>(0.000)        |
| $\hat{C}_2$       |                   | ZIGP            | 204.14<br>(13.53)   | 0.0500<br>(0.0272)        | 0.999<br>(0.005)          | 186.47<br>(12.94)       | 0.0052<br>(0.0056) | 0.956<br>(0.018)   | 190.29<br>(13.10) | 0.0096<br>(0.0082) | 0.971<br>(0.017)          |                         |
|                   |                   | ZIP             | 197.15<br>(13.25)   | 0.0236<br>(0.0155)        | 0.992<br>(0.009)          | 196.96<br>(13.30)       | 0.0233<br>(0.0157) | 0.991<br>(0.010)   | 199.26<br>(12.93) | 0.0296<br>(0.0150) | 0.996<br>(0.008)          |                         |
|                   |                   | GP              | 227.63<br>(14.53)   | 0.1469<br>(0.0338)        | 1.000<br>(0.000)          | 190.12<br>(13.10)       | 0.0091<br>(0.0087) | 0.971<br>(0.014)   | 193.62<br>(12.75) | 0.0143<br>(0.0086) | 0.983<br>(0.010)          |                         |
|                   |                   | P               | 250.24<br>(26.30)   | 0.2186<br>(0.0715)        | 1.000<br>(0.000)          | 250.24<br>(26.30)       | 0.2186<br>(0.0715) | 1.000<br>(0.000)   | 228.55<br>(13.59) | 0.1509<br>(0.0261) | 1.000<br>(0.000)          |                         |
| ZIGP <sub>8</sub> |                   | $\hat{C}_1$     | ZIGP                | 178.35<br>(40.55)         | 0.0473<br>(0.0335)        | 0.864<br>(0.181)        | 164.97<br>(38.30)  | 0.0232<br>(0.0201) | 0.851<br>(0.179)  | 176.16<br>(31.39)  | <b>0.0365</b><br>(0.0246) | <b>0.865</b><br>(0.136) |
|                   |                   |                 | ZIP                 | 255.13<br>(14.48)         | 0.2422<br>(0.0285)        | 0.988<br>(0.008)        | 205.35<br>(24.67)  | 0.0965<br>(0.0625) | 0.947<br>(0.030)  | 206.65<br>(19.14)  | 0.0995<br>(0.0462)        | 0.948<br>(0.025)        |
|                   |                   |                 | GP                  | 350.89<br>(18.62)         | 0.4417<br>(0.0331)        | 1.000<br>(0.000)        | 251.49<br>(17.52)  | 0.2316<br>(0.0396) | 0.986<br>(0.010)  | 231.18<br>(17.56)  | 0.1735<br>(0.0387)        | 0.975<br>(0.013)        |
|                   |                   |                 | P                   | 534.71<br>(41.15)         | 0.6323<br>(0.0323)        | 1.000<br>(0.000)        | 534.71<br>(41.15)  | 0.6323<br>(0.0323) | 1.000<br>(0.000)  | 472.62<br>(45.93)  | 0.5823<br>(0.0457)        | 1.000<br>(0.000)        |
|                   | $\hat{C}_2$       | ZIGP            | 105.24<br>(90.46)   | 0.0272<br>(0.0360)        | 0.511<br>(0.434)          | 96.12<br>(84.92)        | 0.0157<br>(0.0201) | 0.503<br>(0.427)   | 120.71<br>(68.90) | 0.0206<br>(0.0259) | 0.597<br>(0.330)          |                         |
|                   |                   | ZIP             | 255.20<br>(14.43)   | 0.2424<br>(0.0282)        | 0.988<br>(0.008)          | 204.98<br>(25.90)       | 0.0965<br>(0.0646) | 0.944<br>(0.036)   | 206.40<br>(20.09) | 0.0992<br>(0.0486) | 0.947<br>(0.027)          |                         |
|                   |                   | GP              | 306.29<br>(26.61)   | 0.3582<br>(0.0484)        | 1.000<br>(0.000)          | 231.62<br>(18.36)       | 0.1745<br>(0.0417) | 0.975<br>(0.012)   | 226.41<br>(14.01) | 0.1596<br>(0.0267) | 0.972<br>(0.012)          |                         |
|                   |                   | P               | 534.71<br>(41.15)   | 0.6323<br>(0.0323)        | 1.000<br>(0.000)          | 534.71<br>(41.15)       | 0.6323<br>(0.0323) | 1.000<br>(0.000)   | 472.62<br>(45.93) | 0.5823<br>(0.0457) | 1.000<br>(0.000)          |                         |

Table 8: Bias of Parameter Estimates when  $f_1$  is shifted Geometric( $p = 0.08$ ),  $\pi_0 = 0.80$  and  $C = 1$ . The support of  $f_1$  may contain values in  $[0, C]$ . The degree to which the  $f_0$  is mixed with  $f_1$  is described for values from  $[0, K]$ . MZIP $_1(\eta = 0.80, \lambda = 1.5, \theta = 0.3)$  represents the moderately mixed case, MZIP $_2(\eta = 0.80, \lambda = 3, \theta = 0.3)$  represents the heavily mixed case while MZIP $_1(\eta = 0.80, \lambda = 1.5)$  represents the well-separated case. The number in  $(\cdot)$  represents the standard error.

| True $f_0$  | Choice of $C$ | Model for $f_0$ | Bias of Parameter Estimates |                           |                          |                         |                     |                |
|-------------|---------------|-----------------|-----------------------------|---------------------------|--------------------------|-------------------------|---------------------|----------------|
|             |               |                 | $\hat{\eta}_{\hat{C}}$      | $\hat{\lambda}_{\hat{C}}$ | $\hat{\theta}_{\hat{C}}$ | $\hat{\pi}_{0,\hat{C}}$ | $\hat{C}$           |                |
| MZIP $_1$   | $\hat{C}_1$   | ZIGP            | -0.0313<br>(0.0174)         | 0.7908<br>(0.1396)        | 0.0046<br>(0.0208)       | 0.0535<br>(0.0131)      | 3.15<br>(0.57)      |                |
|             |               | ZIP             | -0.0279<br>(0.0182)         | 0.3619<br>(0.2376)        | NA                       | 0.0367<br>(0.0167)      | 2.00<br>(0.79)      |                |
|             |               | GP              | NA                          | -0.2453<br>(0.0247)       | 0.0052<br>(0.0666)       | 0.0458<br>(0.0167)      | 3.04<br>(1.47)      |                |
|             |               | P               | NA                          | -1.4209<br>(0.0113)       | NA                       | -0.0681<br>(0.0142)     | 0.00<br>(0.00)      |                |
|             | $\hat{C}_2$   | ZIGP            | -0.0406<br>(0.0204)         | 0.9192<br>(0.1738)        | 0.0125<br>(0.0207)       | 0.0662<br>(0.0204)      | 2.04<br>(0.36)      |                |
|             |               | ZIP             | -0.0362<br>(0.0236)         | 0.4980<br>(0.3446)        | NA                       | 0.0491<br>(0.0280)      | 1.04<br>(0.20)      |                |
|             |               | GP              | NA                          | -0.2260<br>(0.0295)       | 0.0051<br>(0.0663)       | 0.0513<br>(0.0172)      | 2.10<br>(0.47)      |                |
|             |               | P               | NA                          | -1.4209<br>(0.0113)       | NA                       | -0.0681<br>(0.0142)     | 0.00<br>(0.00)      |                |
|             | MZIP $_1$     | $\hat{C}_1$     | ZIGP                        | -0.0226<br>(0.0301)       | 1.1388<br>(0.2064)       | -0.2427<br>(0.1066)     | 0.0520<br>(0.0263)  | 3.43<br>(0.91) |
|             |               |                 | ZIP                         | 0.0038<br>(0.0200)        | 0.6122<br>(0.3320)       | NA                      | 0.0166<br>(0.0206)  | 1.74<br>(0.73) |
|             |               |                 | GP                          | NA                        | -0.2354<br>(0.0267)      | -0.2765<br>(0.1412)     | 0.0302<br>(0.0309)  | 3.04<br>(3.10) |
|             |               |                 | P                           | NA                        | -1.4412<br>(0.0101)      | NA                      | -0.0828<br>(0.0145) | 0.00<br>(0.03) |
| $\hat{C}_2$ |               | ZIGP            | -0.0404<br>(0.0622)         | 1.2058<br>(0.2831)        | -0.1940<br>(0.1889)      | 0.0661<br>(0.0480)      | 2.87<br>(0.69)      |                |
|             |               | ZIP             | -0.0043<br>(0.0278)         | 0.7245<br>(0.4318)        | NA                       | 0.0267<br>(0.0318)      | 1.06<br>(0.24)      |                |
|             |               | GP              | NA                          | -0.2253<br>(0.0477)       | -0.2767<br>(0.1398)      | 0.0318<br>(0.0310)      | 2.11<br>(0.71)      |                |
|             |               | P               | NA                          | -1.4412<br>(0.0101)       | NA                       | -0.0828<br>(0.0145)     | 0.00<br>(0.03)      |                |
| MZIP $_2$   |               | $\hat{C}_1$     | ZIGP                        | -0.0637<br>(0.0817)       | 0.6712<br>(0.3869)       | -0.1755<br>(0.1826)     | 0.0621<br>(0.0555)  | 4.26<br>(1.09) |
|             |               |                 | ZIP                         | -0.0039<br>(0.0318)       | 0.2749<br>(0.4407)       | NA                      | 0.0075<br>(0.0328)  | 2.51<br>(1.00) |
|             |               |                 | GP                          | NA                        | -1.7202<br>(0.0282)      | -0.2931<br>(0.0769)     | -0.0269<br>(0.0249) | 2.26<br>(1.96) |
|             |               |                 | P                           | NA                        | -2.9721<br>(0.0088)      | NA                      | -0.1333<br>(0.0152) | 0.00<br>(0.05) |
|             | $\hat{C}_2$   | ZIGP            | -0.1066<br>(0.1266)         | 0.8277<br>(0.5559)        | -0.1015<br>(0.2436)      | 0.0850<br>(0.0732)      | 3.44<br>(0.69)      |                |
|             |               | ZIP             | -0.0212<br>(0.0457)         | 0.4601<br>(0.5401)        | NA                       | 0.0275<br>(0.0494)      | 1.52<br>(0.54)      |                |
|             |               | GP              | NA                          | -1.7183<br>(0.0408)       | -0.2932<br>(0.0761)      | -0.0268<br>(0.0249)     | 2.02<br>(0.25)      |                |
|             |               | P               | NA                          | -2.9721<br>(0.0088)       | NA                       | -0.1333<br>(0.0152)     | 0.00<br>(0.05)      |                |



Table 9: Bias of Parameter Estimates when  $f_1$  is shifted Binomial( $n = 250, p = 0.20$ ),  $\pi_0 = 0.35$  and  $C = 1$ . The support of  $f_1$  may contain values in  $[0, C]$ . The degree to which the  $f_0$  is mixed with  $f_1$  is described for values from  $[0, K]$ . MZIGP<sub>3</sub>( $\eta = 0.40, \lambda = 1, \theta = 0.3$ ) represents the moderately mixed case, MZIGP<sub>4</sub>( $\eta = 0.40, \lambda = 4, \theta = 0.3$ ) represents the heavily mixed case while MZIGP<sub>2</sub>( $\eta = 0.40, \lambda = 1.5$ ) represents the well-separated case. The number in (·) represents the standard error.

| True $f_0$         | Choice of $C$      | Model for $f_0$ | Bias of Parameter Estimates |                           |                          |                         |                     |                |
|--------------------|--------------------|-----------------|-----------------------------|---------------------------|--------------------------|-------------------------|---------------------|----------------|
|                    |                    |                 | $\hat{\eta}_{\hat{C}}$      | $\hat{\lambda}_{\hat{C}}$ | $\hat{\theta}_{\hat{C}}$ | $\hat{\pi}_{0,\hat{C}}$ | $\hat{C}$           |                |
| MZIGP <sub>2</sub> | $\hat{C}_1$        | ZIGP            | -0.0313<br>(0.0433)         | 0.8146<br>(0.1210)        | 0.1342<br>(0.1611)       | 0.0961<br>(0.0421)      | 4.16<br>(0.58)      |                |
|                    |                    | ZIP             | -0.0145<br>(0.0301)         | 0.5325<br>(0.2276)        | NA                       | 0.0586<br>(0.0191)      | 3.31<br>(0.56)      |                |
|                    |                    | GP              | NA                          | 0.3489<br>(0.0567)        | 0.6793<br>(0.0156)       | 0.2740<br>(0.0241)      | 6.04<br>(0.60)      |                |
|                    |                    | P               | NA                          | -0.9261<br>(0.2106)       | NA                       | -0.0355<br>(0.0349)     | 0.72<br>(0.66)      |                |
|                    | $\hat{C}_2$        | ZIGP            | -0.1172<br>(0.0721)         | 1.1124<br>(0.3754)        | 0.3889<br>(0.2113)       | 0.2454<br>(0.1362)      | 2.72<br>(0.76)      |                |
|                    |                    | ZIP             | -0.0197<br>(0.0343)         | 0.3069<br>(0.3078)        | NA                       | 0.0444<br>(0.0314)      | 1.00<br>(0.00)      |                |
|                    |                    | GP              | NA                          | 0.8247<br>(0.2719)        | 0.6413<br>(0.0302)       | 0.4984<br>(0.1012)      | 1.84<br>(0.56)      |                |
|                    |                    | P               | NA                          | -1.0845<br>(0.1098)       | NA                       | -0.0645<br>(0.0220)     | 0.12<br>(0.33)      |                |
|                    | MZIGP <sub>3</sub> | $\hat{C}_1$     | ZIGP                        | -0.0213<br>(0.0482)       | 1.5176<br>(0.1618)       | 0.1573<br>(0.1506)      | 0.1723<br>(0.0469)  | 4.74<br>(0.72) |
|                    |                    |                 | ZIP                         | 0.0963<br>(0.0323)        | 0.9915<br>(0.3795)       | NA                      | 0.0407<br>(0.0234)  | 2.79<br>(0.72) |
|                    |                    |                 | GP                          | NA                        | 0.8144<br>(0.0548)       | 0.4057<br>(0.0144)      | 0.2820<br>(0.0244)  | 5.77<br>(0.64) |
|                    |                    |                 | P                           | NA                        | -0.5978<br>(0.1188)      | NA                      | -0.0361<br>(0.0222) | 0.63<br>(0.49) |
| $\hat{C}_2$        |                    | ZIGP            | -0.0900<br>(0.0523)         | 1.9875<br>(0.3843)        | 0.2011<br>(0.0681)       | 0.3099<br>(0.1175)      | 1.90<br>(0.53)      |                |
|                    |                    | ZIP             | 0.1013<br>(0.0386)          | 0.5689<br>(0.3252)        | NA                       | 0.0148<br>(0.0237)      | 1.00<br>(0.00)      |                |
|                    |                    | GP              | NA                          | 1.1286<br>(0.1914)        | 0.3751<br>(0.0244)       | 0.4428<br>(0.0926)      | 1.90<br>(0.42)      |                |
|                    |                    | P               | NA                          | -0.6189<br>(0.1140)       | NA                       | -0.0399<br>(0.0223)     | 0.52<br>(0.50)      |                |
| MZIGP <sub>4</sub> |                    | $\hat{C}_1$     | ZIGP                        | -0.1182<br>(0.0900)       | 0.7706<br>(0.6054)       | -0.0268<br>(0.1636)     | 0.2040<br>(0.1817)  | 4.55<br>(1.32) |
|                    |                    |                 | ZIP                         | -0.0361<br>(0.0518)       | 0.9477<br>(0.5440)       | NA                      | 0.0522<br>(0.0497)  | 5.11<br>(1.83) |
|                    |                    |                 | GP                          | NA                        | -1.6401<br>(0.1262)      | 0.3958<br>(0.0163)      | 0.1999<br>(0.0416)  | 4.70<br>(1.00) |
|                    |                    |                 | P                           | NA                        | -3.6318<br>(0.0635)      | NA                      | -0.1646<br>(0.0123) | 1.00<br>(0.04) |
|                    | $\hat{C}_2$        | ZIGP            | -0.2267<br>(0.1063)         | 1.7636<br>(1.2774)        | 0.0454<br>(0.1185)       | 0.4527<br>(0.2162)      | 1.51<br>(0.84)      |                |
|                    |                    | ZIP             | 0.0516<br>(0.1027)          | 0.0295<br>(0.7972)        | NA                       | -0.0159<br>(0.0886)     | 1.51<br>(0.53)      |                |
|                    |                    | GP              | NA                          | -1.3778<br>(0.1095)       | 0.3682<br>(0.0160)       | 0.3337<br>(0.0653)      | 1.02<br>(0.13)      |                |
|                    |                    | P               | NA                          | -3.6321<br>(0.0619)       | NA                       | -0.1647<br>(0.0123)     | 1.00<br>(0.03)      |                |

Table 10: Bias of Parameter Estimates when  $f_1$  is shifted Geometric( $p = 0.08$ ),  $\pi_0 = 0.85$  and  $C = 1$ . The support of  $f_1$  may contain values in  $[0, C]$ . The degree to which the  $f_0$  is mixed with  $f_1$  is described for values from  $[0, K]$ . MZIP<sub>5</sub>( $\eta = 0.40, \lambda = 1, \theta = 0.15$ ) represents the moderately mixed case, MZIP<sub>6</sub>( $\eta = 0.40, \lambda = 3, \theta = 0.15$ ) represents the heavily mixed case while MZIP<sub>3</sub>( $\eta = 0.40, \lambda = 1.5$ ) represents the well-separated case. The number in (·) represents the standard error.

| True $f_0$        | Choice of $C$     | Model for $f_0$ | Bias of Parameter Estimates |                           |                          |                         |                     |                |
|-------------------|-------------------|-----------------|-----------------------------|---------------------------|--------------------------|-------------------------|---------------------|----------------|
|                   |                   |                 | $\hat{\eta}_{\hat{C}}$      | $\hat{\lambda}_{\hat{C}}$ | $\hat{\theta}_{\hat{C}}$ | $\hat{\pi}_{0,\hat{C}}$ | $\hat{C}$           |                |
| MZIP <sub>3</sub> | $\hat{C}_1$       | ZIGP            | 0.0305<br>(0.0200)          | 0.4481<br>(0.0629)        | 0.0000<br>(0.0000)       | 0.0370<br>(0.0108)      | 3.74<br>(0.53)      |                |
|                   |                   | ZIP             | -0.0057<br>(0.0258)         | 0.0300<br>(0.1290)        | NA                       | 0.0121<br>(0.0194)      | 2.00<br>(0.82)      |                |
|                   |                   | GP              | NA                          | 0.0088<br>(0.0314)        | 0.0000<br>(0.0000)       | 0.0306<br>(0.0110)      | 3.21<br>(0.43)      |                |
|                   |                   | P               | NA                          | -1.1227<br>(0.0340)       | NA                       | -0.1880<br>(0.0174)     | 0.00<br>(0.00)      |                |
|                   | $\hat{C}_2$       | ZIGP            | 0.0255<br>(0.0196)          | 0.5993<br>(0.0899)        | 0.0000<br>(0.0000)       | 0.0653<br>(0.0164)      | 2.03<br>(0.18)      |                |
|                   |                   | ZIP             | -0.0058<br>(0.0253)         | 0.0821<br>(0.1810)        | NA                       | 0.0223<br>(0.0307)      | 1.00<br>(0.05)      |                |
|                   |                   | GP              | NA                          | 0.0516<br>(0.0364)        | 0.0000<br>(0.0000)       | 0.0447<br>(0.0132)      | 2.05<br>(0.22)      |                |
|                   |                   | P               | NA                          | -1.1227<br>(0.0340)       | NA                       | -0.1880<br>(0.0174)     | 0.00<br>(0.00)      |                |
|                   | MZIP <sub>5</sub> | $\hat{C}_1$     | ZIGP                        | 0.1232<br>(0.0196)        | 0.8350<br>(0.0688)       | -0.1500<br>(0.0000)     | 0.0307<br>(0.0110)  | 3.16<br>(0.47) |
|                   |                   |                 | ZIP                         | 0.0644<br>(0.0326)        | 0.2103<br>(0.1480)       | NA                      | -0.0073<br>(0.0183) | 1.35<br>(0.53) |
|                   |                   |                 | GP                          | NA                        | 0.3755<br>(0.0278)       | -0.1500<br>(0.0000)     | 0.0262<br>(0.0109)  | 3.01<br>(0.28) |
|                   |                   |                 | P                           | NA                        | -0.6936<br>(0.0269)      | NA                      | -0.1329<br>(0.0166) | 0.00<br>(0.00) |
| $\hat{C}_2$       |                   | ZIGP            | 0.1202<br>(0.0197)          | 0.9150<br>(0.0944)        | -0.1500<br>(0.0000)      | 0.0433<br>(0.0166)      | 1.98<br>(0.13)      |                |
|                   |                   | ZIP             | 0.0646<br>(0.0326)          | 0.2194<br>(0.1625)        | NA                       | -0.0060<br>(0.0205)     | 1.00<br>(0.03)      |                |
|                   |                   | GP              | NA                          | 0.4021<br>(0.0303)        | -0.1500<br>(0.0000)      | 0.0346<br>(0.0121)      | 2.06<br>(0.23)      |                |
|                   |                   | P               | NA                          | -0.6936<br>(0.0269)       | NA                       | -0.1329<br>(0.0166)     | 0.00<br>(0.00)      |                |
| MZIP <sub>6</sub> |                   | $\hat{C}_1$     | ZIGP                        | 0.0070<br>(0.0325)        | 0.3117<br>(0.1786)       | -0.1172<br>(0.0769)     | -0.0020<br>(0.0305) | 3.60<br>(0.91) |
|                   |                   |                 | ZIP                         | 0.0474<br>(0.0369)        | -0.0871<br>(0.3235)      | NA                      | -0.0813<br>(0.0616) | 2.02<br>(0.92) |
|                   |                   |                 | GP                          | NA                        | -1.1926<br>(0.0548)      | -0.1500<br>(0.0000)     | -0.1402<br>(0.0184) | 2.01<br>(0.08) |
|                   |                   |                 | P                           | NA                        | -2.8201<br>(0.0233)      | NA                      | -0.4126<br>(0.0156) | 0.00<br>(0.00) |
|                   | $\hat{C}_2$       | ZIGP            | -0.0262<br>(0.0664)         | 0.5512<br>(0.3922)        | -0.0952<br>(0.1364)      | 0.0456<br>(0.0631)      | 1.95<br>(0.46)      |                |
|                   |                   | ZIP             | 0.0290<br>(0.0645)          | 0.0566<br>(0.5305)        | NA                       | -0.0491<br>(0.1002)     | 1.00<br>(0.21)      |                |
|                   |                   | GP              | NA                          | -1.0474<br>(0.0607)       | -0.1500<br>(0.0000)      | -0.0814<br>(0.0287)     | 1.00<br>(0.04)      |                |
|                   |                   | P               | NA                          | -2.8201<br>(0.0233)       | NA                       | -0.4126<br>(0.0156)     | 0.00<br>(0.00)      |                |

Table 11: Bias of Parameter Estimates when  $f_1$  is shifted Binomial( $n = 250, p = 0.20$ ),  $\pi_0 = 0.80$  and  $C = 1$ . The support of  $f_1$  may contain values in  $[0, C]$ . The degree to which the  $f_0$  is mixed with  $f_1$  is described for values from  $[0, K]$ . MZIGP<sub>7</sub>( $\eta = 0.40, \lambda = 1, \theta = 0.2$ ) represents the moderately mixed case, MZIGP<sub>8</sub>( $\eta = 0.40, \lambda = 3, \theta = 0.2$ ) represents the heavily mixed case while MZIGP<sub>4</sub>( $\eta = 0.40, \lambda = 1.5$ ) represents the well-separated case. The number in (·) represents the standard error.

| True $f_0$         | Choice of $C$      | Model for $f_0$ | Bias of Parameter Estimates |                           |                          |                         |                     |                |
|--------------------|--------------------|-----------------|-----------------------------|---------------------------|--------------------------|-------------------------|---------------------|----------------|
|                    |                    |                 | $\hat{\eta}_{\hat{C}}$      | $\hat{\lambda}_{\hat{C}}$ | $\hat{\theta}_{\hat{C}}$ | $\hat{\pi}_{0,\hat{C}}$ | $\hat{C}$           |                |
| MZIGP <sub>4</sub> | $\hat{C}_1$        | ZIGP            | 0.0347<br>(0.0205)          | 0.3930<br>(0.0631)        | 0.0000<br>(0.0000)       | 0.0271<br>(0.0127)      | 3.94<br>(0.50)      |                |
|                    |                    | ZIP             | -0.0058<br>(0.0261)         | -0.0114<br>(0.1288)       | NA                       | 0.0082<br>(0.0206)      | 2.32<br>(0.93)      |                |
|                    |                    | GP              | NA                          | -0.0189<br>(0.0324)       | 0.0000<br>(0.0000)       | 0.0226<br>(0.0128)      | 3.43<br>(0.51)      |                |
|                    |                    | P               | NA                          | -1.1214<br>(0.0332)       | NA                       | -0.1721<br>(0.0173)     | 0.00<br>(0.00)      |                |
|                    | $\hat{C}_2$        | ZIGP            | 0.0289<br>(0.0203)          | 0.5738<br>(0.1087)        | 0.0000<br>(0.0000)       | 0.0588<br>(0.0234)      | 2.00<br>(0.18)      |                |
|                    |                    | ZIP             | -0.0056<br>(0.0256)         | 0.0395<br>(0.1842)        | NA                       | 0.0175<br>(0.0311)      | 1.00<br>(0.03)      |                |
|                    |                    | GP              | NA                          | 0.0344<br>(0.0382)        | 0.0000<br>(0.0000)       | 0.0389<br>(0.0151)      | 2.05<br>(0.22)      |                |
|                    |                    | P               | NA                          | -1.1214<br>(0.0332)       | NA                       | -0.1721<br>(0.0173)     | 0.00<br>(0.00)      |                |
|                    | MZIGP <sub>7</sub> | $\hat{C}_1$     | ZIGP                        | 0.1384<br>(0.0206)        | 0.8343<br>(0.0770)       | -0.2000<br>(0.0004)     | 0.0175<br>(0.0134)  | 3.20<br>(0.49) |
|                    |                    |                 | ZIP                         | 0.0795<br>(0.0338)        | 0.1919<br>(0.1561)       | NA                      | -0.0181<br>(0.0191) | 1.41<br>(0.57) |
|                    |                    |                 | GP                          | NA                        | 0.3627<br>(0.0297)       | -0.2000<br>(0.0000)     | 0.0133<br>(0.0132)  | 3.00<br>(0.28) |
|                    |                    |                 | P                           | NA                        | -0.7076<br>(0.0269)      | NA                      | -0.1295<br>(0.0168) | 0.00<br>(0.00) |
| $\hat{C}_2$        |                    | ZIGP            | 0.1313<br>(0.0234)          | 0.9486<br>(0.1715)        | -0.1999<br>(0.0005)      | 0.0370<br>(0.0321)      | 1.88<br>(0.33)      |                |
|                    |                    | ZIP             | 0.0793<br>(0.0338)          | 0.1928<br>(0.1641)        | NA                       | -0.0179<br>(0.0201)     | 1.00<br>(0.00)      |                |
|                    |                    | GP              | NA                          | 0.3898<br>(0.0297)        | -0.2000<br>(0.0000)      | 0.0213<br>(0.0143)      | 2.02<br>(0.14)      |                |
|                    |                    | P               | NA                          | -0.7076<br>(0.0269)       | NA                       | -0.1295<br>(0.0168)     | 0.00<br>(0.00)      |                |
| MZIGP <sub>8</sub> |                    | $\hat{C}_1$     | ZIGP                        | 0.0082<br>(0.0364)        | 0.3075<br>(0.1839)       | -0.1070<br>(0.0936)     | 0.0027<br>(0.0531)  | 4.17<br>(1.02) |
|                    |                    |                 | ZIP                         | 0.0708<br>(0.0404)        | -0.1315<br>(0.3716)      | NA                      | -0.1065<br>(0.0621) | 2.08<br>(0.99) |
|                    |                    |                 | GP                          | NA                        | -1.2371<br>(0.0532)      | -0.2000<br>(0.0000)     | -0.1550<br>(0.0185) | 2.01<br>(0.11) |
|                    |                    |                 | P                           | NA                        | -2.8292<br>(0.0239)      | NA                      | -0.3900<br>(0.0150) | 0.00<br>(0.00) |
|                    | $\hat{C}_2$        | ZIGP            | -0.0707<br>(0.0959)         | 0.6657<br>(0.4907)        | 0.0296<br>(0.1742)       | 0.0918<br>(0.1038)      | 2.46<br>(0.65)      |                |
|                    |                    | ZIP             | 0.0627<br>(0.0549)          | -0.0753<br>(0.4748)       | NA                       | -0.0897<br>(0.0935)     | 1.02<br>(0.14)      |                |
|                    |                    | GP              | NA                          | -1.0901<br>(0.0568)       | -0.2000<br>(0.0000)      | -0.1013<br>(0.0271)     | 1.00<br>(0.03)      |                |
|                    |                    | P               | NA                          | -2.8292<br>(0.0239)       | NA                       | -0.3900<br>(0.0150)     | 0.00<br>(0.00)      |                |

Table 12: Numerical Comparison when  $f_1$  is shifted Geometric( $p = 0.08$ ),  $\pi_0 = 0.80$  and  $C = 1$ . The support of  $f_1$  may contain values in  $[0, C]$ . The degree to which the  $f_0$  is mixed with  $f_1$  is described for values from  $[0, K]$ . MZIGP<sub>1</sub>( $\eta = 0.80, \lambda = 1.5, \theta = 0.3$ ) represents the moderately mixed case, MZIGP<sub>2</sub>( $\eta = 0.80, \lambda = 3, \theta = 0.3$ ) represents the heavily mixed case while MZIGP<sub>1</sub>( $\eta = 0.80, \lambda = 1.5$ ) represents the well-separated case. The number in (·) represents the standard error.

| True $f_0$         | Choice of $C$      | Model for $f_0$ | Two-Stage Procedure |                           |                           | One-Stage Procedure     |                    |                    | Storey's FDR      |                    |                           |                         |
|--------------------|--------------------|-----------------|---------------------|---------------------------|---------------------------|-------------------------|--------------------|--------------------|-------------------|--------------------|---------------------------|-------------------------|
|                    |                    |                 | $R$                 | $\widehat{FDR}$           | $\widehat{TPR}$           | $R$                     | $\widehat{FDR}$    | $\widehat{TPR}$    | $R$               | $\widehat{FDR}$    | $\widehat{TPR}$           |                         |
| MZIGP <sub>1</sub> | C <sub>1</sub>     | ZIGP            | 138.74<br>(12.84)   | <b>0.0018</b><br>(0.0038) | <b>0.693</b><br>(0.052)   | 122.42<br>(11.98)       | 0.0002<br>(0.0014) | 0.676<br>(0.043)   | 120.32<br>(11.67) | 0.0001<br>(0.0010) | 0.602<br>(0.049)          |                         |
|                    |                    | ZIP             | 136.74<br>(11.37)   | 0.0012<br>(0.0032)        | 0.683<br>(0.037)          | 132.48<br>(12.99)       | 0.0009<br>(0.0030) | 0.683<br>(0.037)   | 129.17<br>(12.10) | 0.0006<br>(0.0022) | 0.646<br>(0.048)          |                         |
|                    |                    | GP              | 163.90<br>(19.08)   | 0.0214<br>(0.0180)        | 0.801<br>(0.071)          | 134.83<br>(14.97)       | 0.0008<br>(0.0024) | 0.722<br>(0.065)   | 134.90<br>(14.91) | 0.0009<br>(0.0025) | 0.674<br>(0.062)          |                         |
|                    |                    | P               | 259.70<br>(26.43)   | 0.2358<br>(0.0565)        | 0.986<br>(0.027)          | 259.70<br>(26.43)       | 0.2358<br>(0.0565) | 0.986<br>(0.027)   | 217.01<br>(12.92) | 0.1402<br>(0.0243) | 0.933<br>(0.018)          |                         |
|                    | C <sub>2</sub>     | ZIGP            | 133.69<br>(13.54)   | 0.0012<br>(0.0032)        | 0.668<br>(0.055)          | 118.19<br>(12.69)       | 0.0001<br>(0.0010) | 0.659<br>(0.048)   | 116.59<br>(11.57) | 0.0001<br>(0.0009) | 0.583<br>(0.048)          |                         |
|                    |                    | ZIP             | 136.74<br>(11.36)   | 0.0012<br>(0.0032)        | 0.683<br>(0.037)          | 129.38<br>(14.20)       | 0.0009<br>(0.0030) | 0.680<br>(0.040)   | 126.57<br>(13.10) | 0.0005<br>(0.0021) | 0.633<br>(0.055)          |                         |
|                    |                    | GP              | 181.36<br>(19.33)   | 0.0547<br>(0.0194)        | 0.857<br>(0.072)          | 134.75<br>(14.97)       | 0.0008<br>(0.0024) | 0.693<br>(0.066)   | 134.89<br>(14.92) | 0.0009<br>(0.0025) | 0.674<br>(0.062)          |                         |
|                    |                    | P               | 259.70<br>(26.43)   | 0.2358<br>(0.0565)        | 0.986<br>(0.027)          | 259.70<br>(26.43)       | 0.2358<br>(0.0565) | 0.986<br>(0.027)   | 217.01<br>(12.92) | 0.1402<br>(0.0243) | 0.933<br>(0.018)          |                         |
|                    | MZIGP <sub>1</sub> | C <sub>1</sub>  | ZIGP                | 124.44<br>(25.52)         | <b>0.0280</b><br>(0.0197) | <b>0.604</b><br>(0.116) | 112.31<br>(23.52)  | 0.0170<br>(0.0148) | 0.603<br>(0.115)  | 110.42<br>(20.66)  | 0.0151<br>(0.0133)        | 0.544<br>(0.096)        |
|                    |                    |                 | ZIP                 | 145.47<br>(12.45)         | 0.0486<br>(0.0201)        | 0.692<br>(0.038)        | 137.26<br>(16.15)  | 0.0387<br>(0.0231) | 0.689<br>(0.040)  | 131.51<br>(13.78)  | 0.0316<br>(0.0189)        | 0.636<br>(0.053)        |
|                    |                    |                 | GP                  | 188.23<br>(36.78)         | 0.1345<br>(0.0385)        | 0.813<br>(0.141)        | 139.82<br>(25.81)  | 0.0465<br>(0.0182) | 0.713<br>(0.123)  | 139.48<br>(25.54)  | 0.0459<br>(0.0172)        | 0.666<br>(0.115)        |
|                    |                    |                 | P                   | 283.16<br>(15.95)         | 0.2942<br>(0.0294)        | 0.999<br>(0.009)        | 283.16<br>(15.95)  | 0.2942<br>(0.0294) | 0.999<br>(0.009)  | 240.01<br>(13.47)  | 0.2226<br>(0.0275)        | 0.933<br>(0.018)        |
| C <sub>2</sub>     |                    | ZIGP            | 114.01<br>(41.00)   | 0.0250<br>(0.0202)        | 0.554<br>(0.194)          | 102.98<br>(37.49)       | 0.0155<br>(0.0149) | 0.553<br>(0.193)   | 102.09<br>(33.41) | 0.0137<br>(0.0132) | 0.503<br>(0.161)          |                         |
|                    |                    | ZIP             | 145.41<br>(12.40)   | 0.0485<br>(0.0200)        | 0.691<br>(0.038)          | 134.07<br>(17.80)       | 0.0356<br>(0.0239) | 0.681<br>(0.049)   | 128.90<br>(15.19) | 0.0292<br>(0.0195) | 0.625<br>(0.060)          |                         |
|                    |                    | GP              | 200.34<br>(35.69)   | 0.1594<br>(0.0265)        | 0.842<br>(0.142)          | 139.67<br>(25.71)       | 0.0462<br>(0.0178) | 0.700<br>(0.122)   | 139.48<br>(25.54) | 0.0459<br>(0.0172) | 0.666<br>(0.115)          |                         |
|                    |                    | P               | 283.16<br>(15.95)   | 0.2942<br>(0.0294)        | 0.999<br>(0.009)          | 283.16<br>(15.95)       | 0.2942<br>(0.0294) | 0.999<br>(0.009)   | 240.01<br>(13.47) | 0.2226<br>(0.0275) | 0.933<br>(0.018)          |                         |
| MZIGP <sub>2</sub> |                    | C <sub>1</sub>  | ZIGP                | 94.00<br>(38.47)          | 0.0477<br>(0.0371)        | 0.442<br>(0.173)        | 92.41<br>(38.05)   | 0.0455<br>(0.0364) | 0.442<br>(0.173)  | 93.25<br>(33.49)   | <b>0.0435</b><br>(0.0327) | <b>0.442</b><br>(0.151) |
|                    |                    |                 | ZIP                 | 172.93<br>(12.11)         | 0.1832<br>(0.0310)        | 0.706<br>(0.033)        | 129.31<br>(20.56)  | 0.0931<br>(0.0436) | 0.626<br>(0.058)  | 123.30<br>(16.38)  | 0.0815<br>(0.0359)        | 0.565<br>(0.058)        |
|                    |                    |                 | GP                  | 256.15<br>(28.29)         | 0.3254<br>(0.0322)        | 0.863<br>(0.082)        | 181.98<br>(24.76)  | 0.2032<br>(0.0400) | 0.751<br>(0.074)  | 171.17<br>(19.29)  | 0.1826<br>(0.0301)        | 0.700<br>(0.070)        |
|                    |                    |                 | P                   | 333.58<br>(15.19)         | 0.4004<br>(0.0269)        | 1.000<br>(0.004)        | 333.58<br>(15.19)  | 0.4004<br>(0.0269) | 1.000<br>(0.004)  | 305.15<br>(21.09)  | 0.3769<br>(0.0302)        | 0.950<br>(0.031)        |
|                    | C <sub>2</sub>     | ZIGP            | 79.47<br>(49.74)    | 0.0413<br>(0.0388)        | 0.373<br>(0.228)          | 78.21<br>(49.13)        | 0.0396<br>(0.0380) | 0.373<br>(0.228)   | 80.20<br>(43.63)  | 0.0373<br>(0.0346) | 0.380<br>(0.201)          |                         |
|                    |                    | ZIP             | 172.95<br>(12.10)   | 0.1832<br>(0.0310)        | 0.706<br>(0.033)          | 123.31<br>(22.43)       | 0.0822<br>(0.0464) | 0.605<br>(0.067)   | 119.03<br>(17.89) | 0.0737<br>(0.0376) | 0.549<br>(0.064)          |                         |
|                    |                    | GP              | 258.24<br>(26.93)   | 0.3286<br>(0.0290)        | 0.867<br>(0.081)          | 181.93<br>(24.75)       | 0.2031<br>(0.0400) | 0.750<br>(0.074)   | 171.17<br>(19.29) | 0.1826<br>(0.0301) | 0.700<br>(0.070)          |                         |
|                    |                    | P               | 333.58<br>(15.19)   | 0.4004<br>(0.0269)        | 1.000<br>(0.004)          | 333.58<br>(15.19)       | 0.4004<br>(0.0269) | 1.000<br>(0.004)   | 305.15<br>(21.09) | 0.3769<br>(0.0302) | 0.950<br>(0.031)          |                         |

Table 13: Numerical Comparison when  $f_1$  is shifted Binomial( $n = 250, p = 0.20$ ),  $\pi_0 = 0.35$  and  $C = 1$ . The support of  $f_1$  may contain values in  $[0, C]$ . The degree to which the  $f_0$  is mixed with  $f_1$  is described for values from  $[0, K]$ . MZIP $_3$ ( $\eta = 0.40, \lambda = 1, \theta = 0.3$ ) represents the moderately mixed case, MZIP $_4$ ( $\eta = 0.40, \lambda = 4, \theta = 0.3$ ) represents the heavily mixed case while MZIP $_2$ ( $\eta = 0.40, \lambda = 1.5$ ) represents the well-separated case. The number in (·) represents the standard error.

| True $f_0$ | Choice of $C$ | Model for $f_0$ | Two-Stage Procedure |                           |                         | One-Stage Procedure |                    |                  | Storey's FDR       |                           |                         |
|------------|---------------|-----------------|---------------------|---------------------------|-------------------------|---------------------|--------------------|------------------|--------------------|---------------------------|-------------------------|
|            |               |                 | $R$                 | $\widehat{FDR}$           | $\widehat{TPR}$         | $R$                 | $\widehat{FDR}$    | $\widehat{TPR}$  | $R$                | $\widehat{FDR}$           | $\widehat{TPR}$         |
| MZIP $_2$  | $C_1$         | ZIGP            | 479.53<br>(151.29)  | <b>0.0003</b><br>(0.0008) | <b>0.747</b><br>(0.236) | 462.31<br>(143.73)  | 0.0001<br>(0.0003) | 0.726<br>(0.227) | 467.90<br>(110.52) | 0.0000<br>(0.0003)        | 0.729<br>(0.173)        |
|            |               | ZIP             | 560.41<br>(15.80)   | 0.0004<br>(0.0009)        | 0.872<br>(0.015)        | 553.81<br>(20.18)   | 0.0003<br>(0.0009) | 0.869<br>(0.018) | 548.26<br>(21.69)  | 0.0002<br>(0.0007)        | 0.854<br>(0.028)        |
|            |               | GP              | 0.00<br>(0.00)      | 0.0000<br>(0.0000)        | 0.000<br>(0.000)        | 0.00<br>(0.00)      | 0.0000<br>(0.0000) | 0.000<br>(0.000) | 46.94<br>(19.16)   | 0.0000<br>(0.0000)        | 0.073<br>(0.029)        |
|            |               | P               | 637.38<br>(30.52)   | 0.0307<br>(0.0266)        | 0.961<br>(0.022)        | 637.38<br>(30.52)   | 0.0307<br>(0.0266) | 0.961<br>(0.022) | 616.13<br>(18.40)  | 0.0126<br>(0.0094)        | 0.947<br>(0.018)        |
|            | $C_2$         | ZIGP            | 162.67<br>(233.83)  | 0.0003<br>(0.0009)        | 0.254<br>(0.365)        | 156.45<br>(223.72)  | 0.0001<br>(0.0003) | 0.247<br>(0.353) | 249.61<br>(166.16) | 0.0000<br>(0.0002)        | 0.389<br>(0.260)        |
|            |               | ZIP             | 567.74<br>(19.64)   | 0.0008<br>(0.0013)        | 0.883<br>(0.022)        | 564.24<br>(23.70)   | 0.0007<br>(0.0013) | 0.880<br>(0.027) | 558.27<br>(23.85)  | 0.0005<br>(0.0011)        | 0.869<br>(0.031)        |
|            |               | GP              | 0.00<br>(0.00)      | 0.0000<br>(0.0000)        | 0.000<br>(0.000)        | 0.00<br>(0.00)      | 0.0000<br>(0.0000) | 0.000<br>(0.000) | 30.14<br>(12.91)   | 0.0000<br>(0.0000)        | 0.047<br>(0.020)        |
|            |               | P               | 655.62<br>(25.58)   | 0.0443<br>(0.0237)        | 0.975<br>(0.014)        | 655.62<br>(25.58)   | 0.0443<br>(0.0237) | 0.975<br>(0.014) | 629.68<br>(15.79)  | 0.0199<br>(0.0081)        | 0.961<br>(0.011)        |
| MZIP $_3$  | $C_1$         | ZIGP            | 147.88<br>(172.11)  | 0.0006<br>(0.0019)        | 0.230<br>(0.268)        | 146.69<br>(169.48)  | 0.0006<br>(0.0017) | 0.229<br>(0.265) | 233.79<br>(120.58) | <b>0.0004</b><br>(0.0014) | <b>0.364</b><br>(0.188) |
|            |               | ZIP             | 569.39<br>(20.45)   | 0.0085<br>(0.0051)        | 0.879<br>(0.024)        | 564.47<br>(24.59)   | 0.0080<br>(0.0053) | 0.874<br>(0.030) | 554.49<br>(25.72)  | 0.0066<br>(0.0045)        | 0.858<br>(0.035)        |
|            |               | GP              | 0.00<br>(0.00)      | 0.0000<br>(0.0000)        | 0.000<br>(0.000)        | 0.00<br>(0.00)      | 0.0000<br>(0.0000) | 0.000<br>(0.000) | 29.76<br>(12.90)   | 0.0000<br>(0.0000)        | 0.046<br>(0.020)        |
|            |               | P               | 654.25<br>(17.96)   | 0.0465<br>(0.0169)        | 0.972<br>(0.011)        | 654.25<br>(17.96)   | 0.0465<br>(0.0169) | 0.972<br>(0.011) | 634.72<br>(19.84)  | 0.0325<br>(0.0127)        | 0.956<br>(0.016)        |
|            | $C_2$         | ZIGP            | 24.50<br>(75.15)    | 0.0001<br>(0.0008)        | 0.038<br>(0.117)        | 23.71<br>(73.97)    | 0.0002<br>(0.0009) | 0.038<br>(0.115) | 147.28<br>(63.21)  | 0.0001<br>(0.0007)        | 0.229<br>(0.098)        |
|            |               | ZIP             | 586.98<br>(23.58)   | 0.0121<br>(0.0064)        | 0.903<br>(0.026)        | 586.27<br>(24.64)   | 0.0121<br>(0.0065) | 0.902<br>(0.028) | 575.04<br>(23.99)  | 0.0096<br>(0.0052)        | 0.887<br>(0.030)        |
|            |               | GP              | 0.00<br>(0.00)      | 0.0000<br>(0.0000)        | 0.000<br>(0.000)        | 0.00<br>(0.00)      | 0.0000<br>(0.0000) | 0.000<br>(0.000) | 22.64<br>(10.47)   | 0.0000<br>(0.0000)        | 0.035<br>(0.016)        |
|            |               | P               | 657.72<br>(18.55)   | 0.0494<br>(0.0176)        | 0.974<br>(0.011)        | 657.72<br>(18.55)   | 0.0494<br>(0.0176) | 0.974<br>(0.011) | 636.37<br>(19.23)  | 0.0335<br>(0.0125)        | 0.958<br>(0.015)        |
| MZIP $_4$  | $C_1$         | ZIGP            | 233.79<br>(212.14)  | 0.0132<br>(0.0176)        | 0.353<br>(0.317)        | 233.71<br>(212.22)  | 0.0132<br>(0.0177) | 0.353<br>(0.317) | 292.67<br>(156.32) | <b>0.0133</b><br>(0.0160) | <b>0.444</b><br>(0.231) |
|            |               | ZIP             | 631.75<br>(36.05)   | 0.0948<br>(0.0235)        | 0.886<br>(0.032)        | 488.20<br>(42.71)   | 0.0342<br>(0.0148) | 0.732<br>(0.055) | 485.26<br>(38.03)  | 0.0330<br>(0.0131)        | 0.727<br>(0.049)        |
|            |               | GP              | 0.00<br>(0.00)      | 0.0000<br>(0.0000)        | 0.000<br>(0.000)        | 0.00<br>(0.00)      | 0.0000<br>(0.0000) | 0.000<br>(0.000) | 49.38<br>(17.78)   | 0.0004<br>(0.0031)        | 0.076<br>(0.027)        |
|            |               | P               | 811.58<br>(17.13)   | 0.2148<br>(0.0166)        | 0.988<br>(0.007)        | 811.58<br>(17.13)   | 0.2148<br>(0.0166) | 0.988<br>(0.007) | 781.80<br>(15.02)  | 0.1946<br>(0.0152)        | 0.976<br>(0.007)        |
|            | $C_2$         | ZIGP            | 70.91<br>(147.99)   | 0.0043<br>(0.0137)        | 0.107<br>(0.219)        | 70.80<br>(148.02)   | 0.0043<br>(0.0138) | 0.107<br>(0.219) | 166.94<br>(117.35) | 0.0048<br>(0.0125)        | 0.256<br>(0.173)        |
|            |               | ZIP             | 664.30<br>(17.50)   | 0.1141<br>(0.0140)        | 0.912<br>(0.013)        | 557.52<br>(68.39)   | 0.0607<br>(0.0306) | 0.808<br>(0.073) | 540.92<br>(58.52)  | 0.0527<br>(0.0238)        | 0.793<br>(0.066)        |
|            |               | GP              | 0.00<br>(0.00)      | 0.0000<br>(0.0000)        | 0.000<br>(0.000)        | 0.00<br>(0.00)      | 0.0000<br>(0.0000) | 0.000<br>(0.000) | 43.78<br>(16.71)   | 0.0004<br>(0.0032)        | 0.068<br>(0.025)        |
|            |               | P               | 811.62<br>(17.06)   | 0.2148<br>(0.0165)        | 0.988<br>(0.007)        | 811.62<br>(17.06)   | 0.2148<br>(0.0165) | 0.988<br>(0.007) | 781.80<br>(15.02)  | 0.1946<br>(0.0152)        | 0.976<br>(0.007)        |

Table 14: Numerical Comparison when  $f_1$  is shifted Geometric( $p = 0.08$ ),  $\pi_0 = 0.85$  and  $C = 1$ . The support of  $f_1$  may contain values in  $[0, C]$ . The degree to which the  $f_0$  is mixed with  $f_1$  is described for values from  $[0, K]$ . MZIGP<sub>5</sub>( $\eta = 0.40, \lambda = 1, \theta = 0.15$ ) represents the moderately mixed case, MZIGP<sub>6</sub>( $\eta = 0.40, \lambda = 3, \theta = 0.15$ ) represents the heavily mixed case while MZIP<sub>3</sub>( $\eta = 0.40, \lambda = 1.5$ ) represents the well-separated case. The number in (·) represents the standard error.

| True $f_0$         | Choice of $C$      | Model for $f_0$ | Two-Stage Procedure |                           |                         | One-Stage Procedure |                    |                           | Storey's FDR            |                    |                    |                  |
|--------------------|--------------------|-----------------|---------------------|---------------------------|-------------------------|---------------------|--------------------|---------------------------|-------------------------|--------------------|--------------------|------------------|
|                    |                    |                 | $R$                 | $\widehat{FDR}$           | $\widehat{TPR}$         | $R$                 | $\widehat{FDR}$    | $\widehat{TPR}$           | $R$                     | $\widehat{FDR}$    | $\widehat{TPR}$    |                  |
| MZIP <sub>3</sub>  | $C_1$              | ZIGP            | 119.14<br>(10.80)   | <b>0.0189</b><br>(0.0149) | <b>0.777</b><br>(0.037) | 96.75<br>(10.71)    | 0.0005<br>(0.0023) | 0.741<br>(0.042)          | 97.50<br>(10.11)        | 0.0006<br>(0.0024) | 0.648<br>(0.048)   |                  |
|                    |                    | ZIP             | 108.29<br>(9.98)    | 0.0039<br>(0.0065)        | 0.717<br>(0.038)        | 104.11<br>(10.97)   | 0.0025<br>(0.0058) | 0.717<br>(0.038)          | 102.88<br>(10.31)       | 0.0020<br>(0.0045) | 0.683<br>(0.047)   |                  |
|                    |                    | GP              | 133.26<br>(12.79)   | 0.0606<br>(0.0300)        | 0.831<br>(0.037)        | 100.24<br>(10.26)   | 0.0009<br>(0.0031) | 0.744<br>(0.044)          | 99.43<br>(9.63)         | 0.0007<br>(0.0026) | 0.660<br>(0.039)   |                  |
|                    |                    | P               | 194.49<br>(37.58)   | 0.2682<br>(0.1040)        | 0.923<br>(0.033)        | 194.49<br>(37.58)   | 0.2682<br>(0.1040) | 0.923<br>(0.033)          | 141.34<br>(16.83)       | 0.0895<br>(0.0513) | 0.851<br>(0.036)   |                  |
|                    | $C_2$              | ZIGP            | 117.80<br>(10.86)   | 0.0167<br>(0.0132)        | 0.770<br>(0.041)        | 92.87<br>(10.15)    | 0.0003<br>(0.0017) | 0.702<br>(0.046)          | 92.68<br>(9.70)         | 0.0002<br>(0.0015) | 0.616<br>(0.046)   |                  |
|                    |                    | ZIP             | 108.29<br>(9.98)    | 0.0039<br>(0.0065)        | 0.717<br>(0.038)        | 103.03<br>(11.01)   | 0.0023<br>(0.0057) | 0.717<br>(0.038)          | 102.05<br>(10.43)       | 0.0018<br>(0.0044) | 0.677<br>(0.048)   |                  |
|                    |                    | GP              | 135.90<br>(10.94)   | 0.0688<br>(0.0222)        | 0.841<br>(0.029)        | 99.47<br>(9.77)     | 0.0007<br>(0.0026) | 0.716<br>(0.043)          | 99.40<br>(9.63)         | 0.0007<br>(0.0026) | 0.660<br>(0.039)   |                  |
|                    |                    | P               | 194.49<br>(37.58)   | 0.2682<br>(0.1040)        | 0.923<br>(0.033)        | 194.49<br>(37.58)   | 0.2682<br>(0.1040) | 0.923<br>(0.033)          | 141.34<br>(16.83)       | 0.0895<br>(0.0513) | 0.851<br>(0.036)   |                  |
|                    | MZIGP <sub>5</sub> | $C_1$           | ZIGP                | 126.92<br>(13.24)         | 0.0568<br>(0.0314)      | 0.795<br>(0.050)    | 98.11<br>(9.97)    | 0.0051<br>(0.0077)        | 0.724<br>(0.042)        | 98.05<br>(9.54)    | 0.0048<br>(0.0069) | 0.649<br>(0.039) |
|                    |                    |                 | ZIP                 | 113.85<br>(12.24)         | 0.0246<br>(0.0186)      | 0.737<br>(0.049)    | 113.78<br>(12.31)  | 0.0245<br>(0.0187)        | 0.737<br>(0.049)        | 109.75<br>(11.01)  | 0.0175<br>(0.0147) | 0.717<br>(0.047) |
|                    |                    |                 | GP                  | 136.31<br>(13.07)         | 0.0840<br>(0.0346)      | 0.829<br>(0.034)    | 104.85<br>(10.94)  | 0.0110<br>(0.0111)        | 0.739<br>(0.042)        | 102.22<br>(10.68)  | 0.0085<br>(0.0099) | 0.674<br>(0.050) |
|                    |                    |                 | P                   | 188.89<br>(29.58)         | 0.2546<br>(0.0843)      | 0.922<br>(0.036)    | 188.89<br>(29.58)  | 0.2546<br>(0.0843)        | 0.922<br>(0.036)        | 157.63<br>(15.88)  | 0.1574<br>(0.0465) | 0.880<br>(0.035) |
| $C_2$              |                    | ZIGP            | 122.06<br>(12.07)   | <b>0.0433</b><br>(0.0266) | <b>0.776</b><br>(0.046) | 96.81<br>(10.05)    | 0.0044<br>(0.0067) | 0.724<br>(0.044)          | 97.33<br>(9.74)         | 0.0046<br>(0.0068) | 0.644<br>(0.043)   |                  |
|                    |                    | ZIP             | 113.84<br>(12.24)   | 0.0247<br>(0.0188)        | 0.737<br>(0.049)        | 113.62<br>(12.47)   | 0.0244<br>(0.0189) | 0.737<br>(0.049)          | 109.57<br>(11.18)       | 0.0173<br>(0.0148) | 0.716<br>(0.048)   |                  |
|                    |                    | GP              | 161.04<br>(13.75)   | 0.1691<br>(0.0389)        | 0.888<br>(0.029)        | 103.79<br>(11.04)   | 0.0100<br>(0.0109) | 0.710<br>(0.041)          | 100.44<br>(10.46)       | 0.0069<br>(0.0090) | 0.663<br>(0.047)   |                  |
|                    |                    | P               | 188.89<br>(29.58)   | 0.2546<br>(0.0843)        | 0.922<br>(0.036)        | 188.89<br>(29.58)   | 0.2546<br>(0.0843) | 0.922<br>(0.036)          | 157.63<br>(15.88)       | 0.1574<br>(0.0465) | 0.880<br>(0.035)   |                  |
| MZIGP <sub>6</sub> |                    | $C_1$           | ZIGP                | 101.52<br>(16.63)         | 0.0742<br>(0.0387)      | 0.623<br>(0.090)    | 86.03<br>(14.76)   | <b>0.0304</b><br>(0.0238) | <b>0.623</b><br>(0.090) | 87.11<br>(13.53)   | 0.0316<br>(0.0212) | 0.561<br>(0.078) |
|                    |                    |                 | ZIP                 | 167.71<br>(12.06)         | 0.2957<br>(0.0361)      | 0.785<br>(0.034)    | 106.83<br>(19.52)  | 0.0878<br>(0.0629)        | 0.724<br>(0.054)        | 101.44<br>(13.39)  | 0.0688<br>(0.0400) | 0.626<br>(0.054) |
|                    |                    |                 | GP                  | 262.12<br>(33.74)         | 0.4938<br>(0.0581)      | 0.872<br>(0.036)    | 156.33<br>(20.06)  | 0.2576<br>(0.0630)        | 0.789<br>(0.036)        | 133.94<br>(13.07)  | 0.1846<br>(0.0413) | 0.725<br>(0.042) |
|                    |                    |                 | P                   | 497.31<br>(48.04)         | 0.7032<br>(0.0297)      | 0.975<br>(0.020)    | 497.31<br>(48.04)  | 0.7032<br>(0.0297)        | 0.975<br>(0.020)        | 380.75<br>(37.42)  | 0.6292<br>(0.0340) | 0.933<br>(0.023) |
|                    | $C_2$              | ZIGP            | 91.68<br>(25.93)    | 0.0544<br>(0.0369)        | 0.573<br>(0.152)        | 78.63<br>(22.20)    | 0.0217<br>(0.0206) | 0.573<br>(0.152)          | 80.53<br>(20.52)        | 0.0236<br>(0.0199) | 0.522<br>(0.126)   |                  |
|                    |                    | ZIP             | 167.71<br>(12.06)   | 0.2957<br>(0.0361)        | 0.785<br>(0.034)        | 103.44<br>(22.26)   | 0.0805<br>(0.0671) | 0.703<br>(0.079)          | 98.78<br>(15.41)        | 0.0637<br>(0.0434) | 0.612<br>(0.068)   |                  |
|                    |                    | GP              | 215.72<br>(16.49)   | 0.4144<br>(0.0390)        | 0.838<br>(0.031)        | 138.10<br>(13.91)   | 0.1993<br>(0.0442) | 0.784<br>(0.033)          | 118.89<br>(12.85)       | 0.1293<br>(0.0421) | 0.687<br>(0.044)   |                  |
|                    |                    | P               | 497.31<br>(48.04)   | 0.7032<br>(0.0297)        | 0.975<br>(0.020)        | 497.31<br>(48.04)   | 0.7032<br>(0.0297) | 0.975<br>(0.020)          | 380.75<br>(37.42)       | 0.6292<br>(0.0340) | 0.933<br>(0.023)   |                  |

Table 15: Numerical Comparison when  $f_1$  is shifted Binomial( $n = 250, p = 0.20$ ),  $\pi_0 = 0.80$  and  $C = 1$ . The support of  $f_1$  may contain values in  $[0, C]$ . The degree to which the  $f_0$  is mixed with  $f_1$  is described for values from  $[0, K]$ . MZIGP $_7$ ( $\eta = 0.40, \lambda = 1, \theta = 0.2$ ) represents the moderately mixed case, MZIGP $_8$ ( $\eta = 0.40, \lambda = 3, \theta = 0.2$ ) represents the heavily mixed case while MZIGP $_4$ ( $\eta = 0.40, \lambda = 1.5$ ) represents the well-separated case. The number in (·) represents the standard error.

| True $f_0$ | Choice of $C$ | Model for $f_0$ | Two-Stage Procedure |                           |                           | One-Stage Procedure     |                    |                           | Storey's FDR            |                    |                    |                  |
|------------|---------------|-----------------|---------------------|---------------------------|---------------------------|-------------------------|--------------------|---------------------------|-------------------------|--------------------|--------------------|------------------|
|            |               |                 | $R$                 | $\widehat{FDR}$           | $\widehat{TPR}$           | $R$                     | $\widehat{FDR}$    | $\widehat{TPR}$           | $R$                     | $\widehat{FDR}$    | $\widehat{TPR}$    |                  |
| MZIGP $_4$ | $C_1$         | ZIGP            | 178.59<br>(13.15)   | <b>0.0128</b><br>(0.0123) | <b>0.907</b><br>(0.024)   | 160.07<br>(12.17)       | 0.0004<br>(0.0015) | 0.856<br>(0.028)          | 162.04<br>(12.54)       | 0.0007<br>(0.0021) | 0.833<br>(0.032)   |                  |
|            |               | ZIP             | 169.56<br>(12.19)   | 0.0024<br>(0.0040)        | 0.870<br>(0.024)          | 166.66<br>(13.19)       | 0.0018<br>(0.0037) | 0.870<br>(0.024)          | 169.54<br>(12.53)       | 0.0027<br>(0.0046) | 0.870<br>(0.027)   |                  |
|            |               | GP              | 187.15<br>(14.46)   | 0.0349<br>(0.0237)        | 0.929<br>(0.023)          | 163.04<br>(12.91)       | 0.0009<br>(0.0025) | 0.870<br>(0.029)          | 168.38<br>(12.53)       | 0.0020<br>(0.0035) | 0.865<br>(0.029)   |                  |
|            |               | P               | 235.79<br>(32.49)   | 0.1907<br>(0.0843)        | 0.970<br>(0.015)          | 235.79<br>(32.49)       | 0.1907<br>(0.0843) | 0.970<br>(0.015)          | 208.33<br>(18.94)       | 0.1061<br>(0.0526) | 0.955<br>(0.019)   |                  |
|            | $C_2$         | ZIGP            | 177.67<br>(12.61)   | 0.0109<br>(0.0082)        | 0.904<br>(0.025)          | 155.66<br>(13.20)       | 0.0003<br>(0.0013) | 0.821<br>(0.034)          | 160.24<br>(12.17)       | 0.0004<br>(0.0016) | 0.824<br>(0.030)   |                  |
|            |               | ZIP             | 169.56<br>(12.19)   | 0.0024<br>(0.0040)        | 0.870<br>(0.024)          | 165.63<br>(13.32)       | 0.0016<br>(0.0035) | 0.869<br>(0.024)          | 168.48<br>(12.92)       | 0.0025<br>(0.0045) | 0.865<br>(0.031)   |                  |
|            |               | GP              | 191.97<br>(13.51)   | 0.0483<br>(0.0207)        | 0.940<br>(0.018)          | 161.48<br>(12.36)       | 0.0006<br>(0.0021) | 0.845<br>(0.028)          | 166.85<br>(12.89)       | 0.0017<br>(0.0033) | 0.857<br>(0.032)   |                  |
|            |               | P               | 235.79<br>(32.49)   | 0.1907<br>(0.0843)        | 0.970<br>(0.015)          | 235.79<br>(32.49)       | 0.1907<br>(0.0843) | 0.970<br>(0.015)          | 208.33<br>(18.94)       | 0.1061<br>(0.0526) | 0.955<br>(0.019)   |                  |
|            | MZIGP $_7$    | $C_1$           | ZIGP                | 189.21<br>(15.01)         | 0.0563<br>(0.0280)        | 0.919<br>(0.027)        | 161.38<br>(12.63)  | 0.0080<br>(0.0077)        | 0.854<br>(0.028)        | 165.63<br>(13.22)  | 0.0120<br>(0.0096) | 0.843<br>(0.035) |
|            |               |                 | ZIP                 | 178.33<br>(13.88)         | 0.0304<br>(0.0183)        | 0.891<br>(0.030)        | 178.30<br>(13.91)  | 0.0304<br>(0.0183)        | 0.891<br>(0.030)        | 178.56<br>(13.32)  | 0.0306<br>(0.0161) | 0.892<br>(0.029) |
|            |               |                 | GP                  | 197.88<br>(14.98)         | 0.0804<br>(0.0290)        | 0.937<br>(0.019)        | 169.43<br>(12.71)  | 0.0153<br>(0.0102)        | 0.873<br>(0.025)        | 170.51<br>(12.23)  | 0.0162<br>(0.0097) | 0.864<br>(0.025) |
|            |               |                 | P                   | 250.55<br>(27.26)         | 0.2380<br>(0.0691)        | 0.976<br>(0.015)        | 250.55<br>(27.26)  | 0.2380<br>(0.0691)        | 0.976<br>(0.015)        | 221.29<br>(13.62)  | 0.1558<br>(0.0269) | 0.963<br>(0.014) |
| $C_2$      |               | ZIGP            | 184.37<br>(14.67)   | <b>0.0444</b><br>(0.0256) | <b>0.907</b><br>(0.031)   | 159.29<br>(12.72)       | 0.0069<br>(0.0070) | 0.844<br>(0.035)          | 162.55<br>(13.09)       | 0.0095<br>(0.0088) | 0.830<br>(0.037)   |                  |
|            |               | ZIP             | 178.35<br>(13.89)   | 0.0304<br>(0.0181)        | 0.891<br>(0.030)          | 178.25<br>(13.97)       | 0.0303<br>(0.0182) | 0.891<br>(0.030)          | 178.56<br>(13.31)       | 0.0305<br>(0.0159) | 0.892<br>(0.029)   |                  |
|            |               | GP              | 221.26<br>(13.80)   | 0.1557<br>(0.0281)        | 0.962<br>(0.014)          | 168.61<br>(13.10)       | 0.0146<br>(0.0103) | 0.862<br>(0.025)          | 170.44<br>(12.33)       | 0.0162<br>(0.0097) | 0.864<br>(0.025)   |                  |
|            |               | P               | 250.55<br>(27.26)   | 0.2380<br>(0.0691)        | 0.976<br>(0.015)          | 250.55<br>(27.26)       | 0.2380<br>(0.0691) | 0.976<br>(0.015)          | 221.29<br>(13.62)       | 0.1558<br>(0.0269) | 0.963<br>(0.014)   |                  |
| MZIGP $_8$ |               | $C_1$           | ZIGP                | 143.50<br>(36.08)         | <b>0.0500</b><br>(0.0351) | <b>0.693</b><br>(0.159) | 129.86<br>(34.28)  | <b>0.0302</b><br>(0.0249) | <b>0.693</b><br>(0.159) | 140.47<br>(28.91)  | 0.0406<br>(0.0272) | 0.686<br>(0.126) |
|            |               |                 | ZIP                 | 237.23<br>(13.94)         | 0.2603<br>(0.0291)        | 0.897<br>(0.022)        | 178.79<br>(26.68)  | 0.1103<br>(0.0625)        | 0.846<br>(0.047)        | 177.92<br>(20.66)  | 0.1074<br>(0.0473) | 0.808<br>(0.045) |
|            |               |                 | GP                  | 338.63<br>(22.89)         | 0.4496<br>(0.0385)        | 0.950<br>(0.018)        | 234.15<br>(17.34)  | 0.2520<br>(0.0387)        | 0.901<br>(0.023)        | 208.63<br>(17.32)  | 0.1871<br>(0.0386) | 0.865<br>(0.028) |
|            |               |                 | P                   | 535.43<br>(43.12)         | 0.6358<br>(0.0321)        | 0.991<br>(0.008)        | 535.43<br>(43.12)  | 0.6358<br>(0.0321)        | 0.991<br>(0.008)        | 468.66<br>(47.36)  | 0.5871<br>(0.0440) | 0.980<br>(0.012) |
|            | $C_2$         | ZIGP            | 84.53<br>(73.44)    | 0.0279<br>(0.0360)        | 0.410<br>(0.351)          | 75.23<br>(68.05)        | 0.0219<br>(0.0243) | 0.410<br>(0.351)          | 93.67<br>(58.24)        | 0.0225<br>(0.0277) | 0.462<br>(0.279)   |                  |
|            |               | ZIP             | 237.23<br>(13.94)   | 0.2603<br>(0.0291)        | 0.897<br>(0.022)          | 177.29<br>(29.34)       | 0.1088<br>(0.0662) | 0.836<br>(0.065)          | 176.54<br>(22.69)       | 0.1052<br>(0.0507) | 0.803<br>(0.053)   |                  |
|            |               | GP              | 289.10<br>(24.97)   | 0.3684<br>(0.0429)        | 0.930<br>(0.021)          | 213.92<br>(21.10)       | 0.2000<br>(0.0486) | 0.895<br>(0.021)          | 204.36<br>(13.63)       | 0.1761<br>(0.0292) | 0.860<br>(0.025)   |                  |
|            |               | P               | 535.43<br>(43.12)   | 0.6358<br>(0.0321)        | 0.991<br>(0.008)          | 535.43<br>(43.12)       | 0.6358<br>(0.0321) | 0.991<br>(0.008)          | 468.66<br>(47.36)       | 0.5871<br>(0.0440) | 0.980<br>(0.012)   |                  |

Table 16: Comparison of Parameter Estimates for Protein Domain Data

| Data      | $f_0$ | $\hat{\eta}_{\hat{C}_1}$ | $\hat{\lambda}_{\hat{C}_1}$ | $\hat{\theta}_{\hat{C}_1}$ | $\hat{\pi}_{0,\hat{C}_1}$ | $\hat{C}_1$ | $D(\hat{C}_1)$ | $\hat{\eta}_{\hat{C}_2}$ | $\hat{\lambda}_{\hat{C}_2}$ | $\hat{\theta}_{\hat{C}_2}$ | $\hat{\pi}_{0,\hat{C}_2}$ | $\hat{C}_2$ | $D(\hat{C}_2)$ |
|-----------|-------|--------------------------|-----------------------------|----------------------------|---------------------------|-------------|----------------|--------------------------|-----------------------------|----------------------------|---------------------------|-------------|----------------|
| cd00031   | ZIGP  | 0.3245                   | 1.9168                      | 0.1416                     | 0.4576                    | 6           | 7              | 0.2252                   | 2.1452                      | 0.5741                     | 0.6141                    | 4           | 36             |
|           | ZIP   | 0.2289                   | 1.0949                      | NA                         | 0.3985                    | 3           | 6              | 0.2760                   | 1.3856                      | NA                         | 0.4244                    | 2           | 6              |
|           | GP    | NA                       | 1.5557                      | 0.6602                     | 0.5537                    | 11          | 36             | NA                       | 2.0943                      | 0.6668                     | 0.8321                    | 3           | 36             |
|           | P     | NA                       | 0.8082                      | NA                         | 0.3944                    | 3           | 6              | NA                       | 0.7994                      | NA                         | 0.3929                    | 2           | 6              |
| cd00054   | ZIGP  | 0.1421                   | 1.2959                      | 0.0000                     | 0.5009                    | 5           | 6              | 0.1421                   | 1.2959                      | 0.0000                     | 0.5009                    | 5           | 6              |
|           | ZIP   | 0.0008                   | 0.8689                      | NA                         | 0.5001                    | 5           | 6              | 0.0008                   | 0.8689                      | NA                         | 0.5001                    | 5           | 6              |
|           | GP    | NA                       | 1.3589                      | 0.1970                     | 0.5348                    | 8           | 9              | NA                       | 1.5687                      | 0.7286                     | 0.7164                    | 6           | 52             |
|           | P     | NA                       | 0.8682                      | NA                         | 0.5001                    | 5           | 6              | NA                       | 0.8682                      | NA                         | 0.5001                    | 5           | 6              |
| cd00180   | ZIGP  | 0.5966                   | 1.8193                      | 0.0948                     | 0.6954                    | 6           | 7              | 0.4573                   | 2.0295                      | 0.7013                     | 0.8710                    | 5           | 63             |
|           | ZIP   | 0.5507                   | 1.1095                      | NA                         | 0.6588                    | 3           | 7              | 0.5331                   | 0.9701                      | NA                         | 0.6484                    | 2           | 7              |
|           | GP    | NA                       | 1.3096                      | 0.8292                     | 0.8379                    | 17          | 63             | NA                       | 1.5161                      | 0.8286                     | 0.9925                    | 7           | 63             |
|           | P     | NA                       | 0.4579                      | NA                         | 0.6518                    | 3           | 7              | NA                       | 0.4579                      | NA                         | 0.6518                    | 3           | 7              |
| cd00204   | ZIGP  | 0.5060                   | 1.2628                      | 0.0002                     | 0.6853                    | 5           | 6              | 0.5062                   | 1.2645                      | 0.0001                     | 0.6854                    | 4           | 5              |
|           | ZIP   | 0.1287                   | 0.5081                      | NA                         | 0.6784                    | 3           | 7              | 0.1403                   | 0.5188                      | NA                         | 0.6792                    | 2           | 7              |
|           | GP    | NA                       | 1.1921                      | 0.7271                     | 0.7799                    | 12          | 34             | NA                       | 1.2046                      | 0.7368                     | 0.7906                    | 10          | 34             |
|           | P     | NA                       | 0.4409                      | NA                         | 0.6780                    | 3           | 7              | NA                       | 0.4358                      | NA                         | 0.6767                    | 2           | 7              |
| cd00882   | ZIGP  | 0.6736                   | 1.3970                      | 0.0000                     | 0.8003                    | 4           | 5              | 0.6734                   | 1.4406                      | 0.0000                     | 0.8041                    | 3           | 4              |
|           | ZIP   | 0.5201                   | 0.6786                      | NA                         | 0.7907                    | 3           | 7              | 0.5136                   | 0.6616                      | NA                         | 0.7896                    | 2           | 7              |
|           | GP    | NA                       | 1.1358                      | 0.0000                     | 0.8016                    | 4           | 5              | NA                       | 1.1358                      | 0.0000                     | 0.8016                    | 4           | 5              |
|           | P     | NA                       | 0.2174                      | NA                         | 0.7503                    | 1           | 7              | NA                       | 0.2174                      | NA                         | 0.7503                    | 1           | 7              |
| pfam00001 | ZIGP  | 0.0526                   | 2.4020                      | 0.3839                     | 0.4031                    | 13          | 18             | 0.0073                   | 5.4512                      | 0.7767                     | 1.0000                    | 2           | 233            |
|           | ZIP   | 0.0000                   | 44.9641                     | NA                         | 1.0000                    | 18          | 45             | 0.0000                   | 44.9641                     | NA                         | 1.0000                    | 18          | 45             |
|           | GP    | NA                       | 2.2464                      | 0.4164                     | 0.4048                    | 13          | 21             | NA                       | 4.8035                      | 0.7937                     | 1.0000                    | 2           | 233            |
|           | P     | NA                       | 46.2118                     | NA                         | 1.0000                    | 18          | 47             | NA                       | 46.2118                     | NA                         | 1.0000                    | 18          | 47             |



## Web Figures:

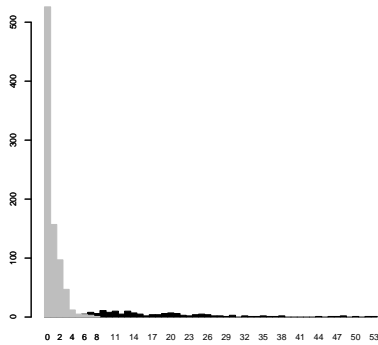

(a) ZIGP<sub>5</sub>

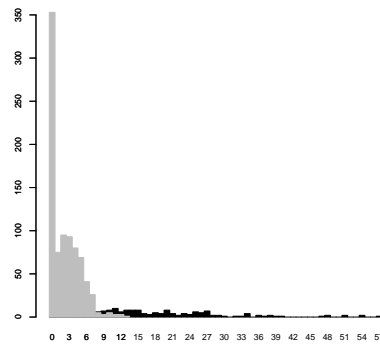

(b) ZIGP<sub>6</sub>

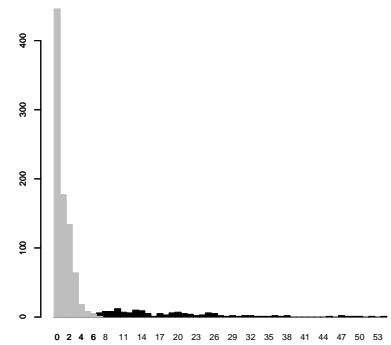

(c) ZIP<sub>3</sub>

Figure 1: Histogram when  $f_1$  is shifted Geometric( $p = 0.08$ ),  $\pi_0 = 0.85$  and  $C = 5$ . (1a) ZIGP<sub>5</sub>( $\eta = 0.40, \lambda = 1, \theta = 0.15$ ) represents the moderately mixed case, (1b) ZIGP<sub>6</sub>( $\eta = 0.40, \lambda = 3, \theta = 0.15$ ) represents the heavily mixed case while (1c) ZIP<sub>3</sub>( $\eta = 0.40, \lambda = 1.5$ ) represents the well-separated case.

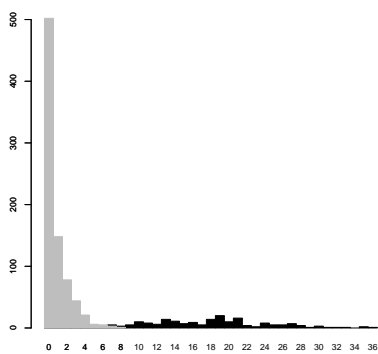

(a) ZIGP<sub>7</sub>

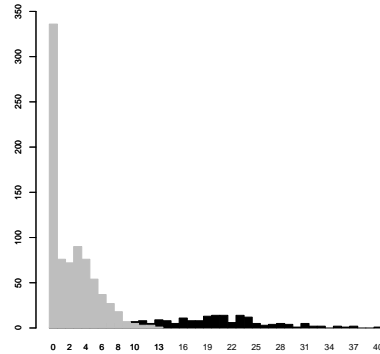

(b) ZIGP<sub>8</sub>

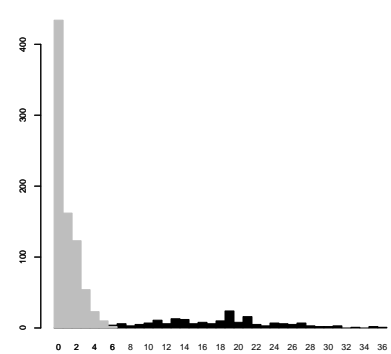

(c) ZIP<sub>4</sub>

Figure 2: Histogram when  $f_1$  is shifted Binomial( $n = 250, p = 0.20$ ),  $\pi_0 = 0.80$  and  $C = 5$ . (2a) ZIGP<sub>7</sub>( $\eta = 0.40, \lambda = 1, \theta = 0.20$ ) represents the moderately mixed case, (2b) ZIGP<sub>8</sub>( $\eta = 0.40, \lambda = 3, \theta = 0.20$ ) represents the heavily mixed case while (2c) ZIP<sub>4</sub>( $\eta = 0.40, \lambda = 1.5$ ) represents the well-separated case.

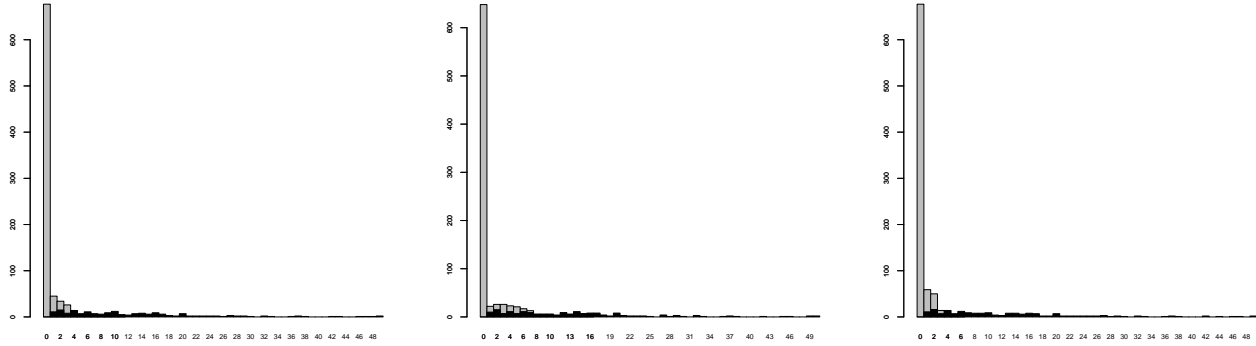

(a) MZIGP<sub>1</sub>

(b) MZIGP<sub>2</sub>

(c) MZIP<sub>1</sub>

Figure 3: Histogram when  $f_1$  is shifted Geometric( $p = 0.08$ ),  $\pi_0 = 0.80$  and  $C = 5$ . The support of  $f_1$  may contain values in  $[0, C]$ . The degree to which the  $f_0$  is mixed with  $f_1$  is described for values from  $[0, K]$ . MZIGP<sub>1</sub>( $\eta = 0.80, \lambda = 1.5, \theta = 0.3$ ) represents the moderately mixed case, MZIGP<sub>2</sub>( $\eta = 0.80, \lambda = 3, \theta = 0.3$ ) represents the heavily mixed case while MZIP<sub>1</sub>( $\eta = 0.80, \lambda = 1.5$ ) represents the well-separated case.

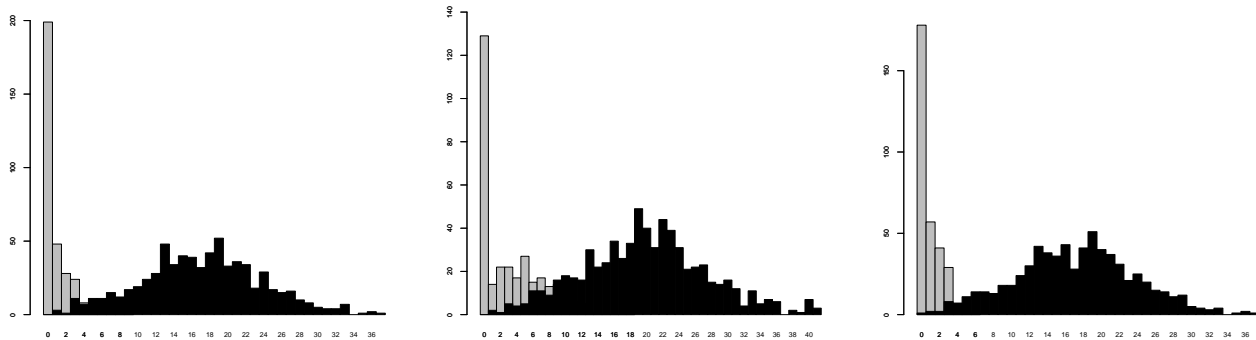

(a) MZIGP<sub>3</sub>

(b) MZIGP<sub>4</sub>

(c) MZIP<sub>2</sub>

Figure 4: Histogram when  $f_1$  is shifted Binomial( $n = 250, p = 0.20$ ),  $\pi_0 = 0.35$  and  $C = 5$ . The support of  $f_1$  may contain values in  $[0, C]$ . The degree to which the  $f_0$  is mixed with  $f_1$  is described for values from  $[0, K]$ . MZIGP<sub>3</sub>( $\eta = 0.40, \lambda = 1, \theta = 0.3$ ) represents the moderately mixed case, MZIGP<sub>4</sub>( $\eta = 0.40, \lambda = 4, \theta = 0.3$ ) represents the heavily mixed case while MZIP<sub>2</sub>( $\eta = 0.40, \lambda = 1.5$ ) represents the well-separated case.

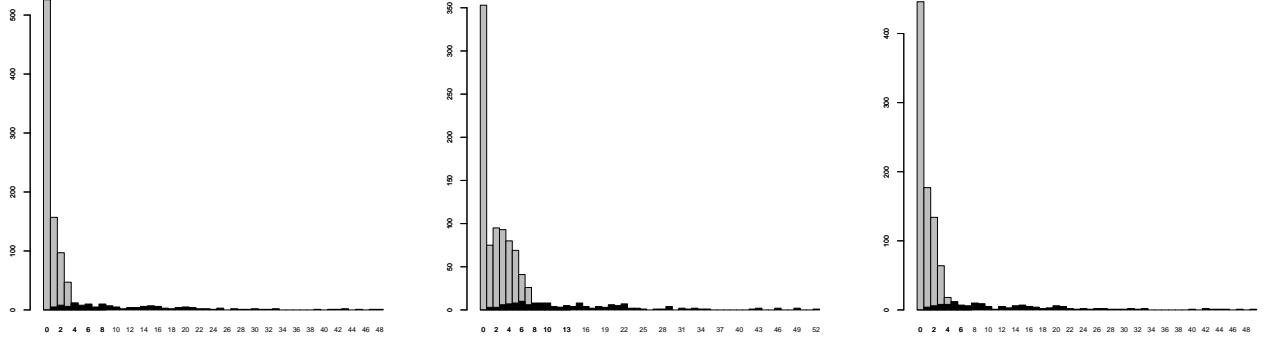

(a) MZIGP<sub>5</sub>

(b) MZIP<sub>6</sub>

(c) MZIP<sub>3</sub>

Figure 5: Histogram when  $f_1$  is shifted Geometric( $p = 0.08$ ),  $\pi_0 = 0.85$  and  $C = 5$ . The support of  $f_1$  may contain values in  $[0, C]$ . The degree to which the  $f_0$  is mixed with  $f_1$  is described for values from  $[0, K]$ . MZIGP<sub>5</sub>( $\eta = 0.40, \lambda = 1, \theta = 0.15$ ) represents the moderately mixed case, MZIGP<sub>6</sub>( $\eta = 0.40, \lambda = 3, \theta = 0.15$ ) represents the heavily mixed case while MZIP<sub>3</sub>( $\eta = 0.40, \lambda = 1.5$ ) represents the well-separated case.

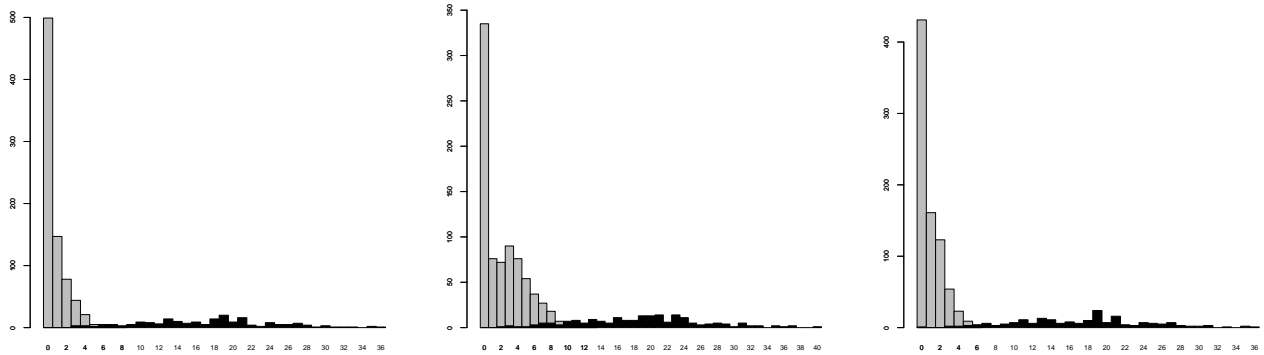

(a) MZIGP<sub>7</sub>

(b) MZIP<sub>8</sub>

(c) MZIP<sub>4</sub>

Figure 6: Histogram when  $f_1$  is shifted Binomial( $n = 250, p = 0.20$ ),  $\pi_0 = 0.80$  and  $C = 5$ . The support of  $f_1$  may contain values in  $[0, C]$ . The degree to which the  $f_0$  is mixed with  $f_1$  is described for values from  $[0, K]$ . MZIGP<sub>7</sub>( $\eta = 0.40, \lambda = 1, \theta = 0.2$ ) represents the moderately mixed case, MZIGP<sub>8</sub>( $\eta = 0.40, \lambda = 3, \theta = 0.2$ ) represents the heavily mixed case while MZIP<sub>4</sub>( $\eta = 0.40, \lambda = 1.5$ ) represents the well-separated case.

## Goodness-of-Fit Assessment:

Corresponding to the six protein domains discussed in Section 4.2, Web Figures 7 to 12 represent the graphical comparison of  $f$  estimation. For each protein domain, the comparison is based on the choice of the cutoff  $C$  and the method of estimation of  $f$  for  $j \leq C$ . Using the assumption on  $f_0$  in (2),  $f(j) = \pi_0 f_0(j)$  for  $j \leq C$ . The three line plots correspond to  $\hat{f}(j) = n_j/N$  and  $\hat{f}(j) = \hat{\pi}_0 \hat{f}_0(j)$  where  $f_0$  is ZIGP or ZIP.

Since ZIGP is a more flexible model than ZIP, ZIGP tends to fit the data for larger values of  $\hat{C}$  while ZIP fits the null distribution for smaller values of  $\hat{C}$ . In some cases, ZIP seems to show more accurate fitting, however ZIP tends to choose small values of  $\hat{C}$  and ZIGP tends to choose large values of  $\hat{C}$ , so it is not straightforward to compare goodness of fit of ZIGP and ZIP for different values of  $\hat{C}$ s.

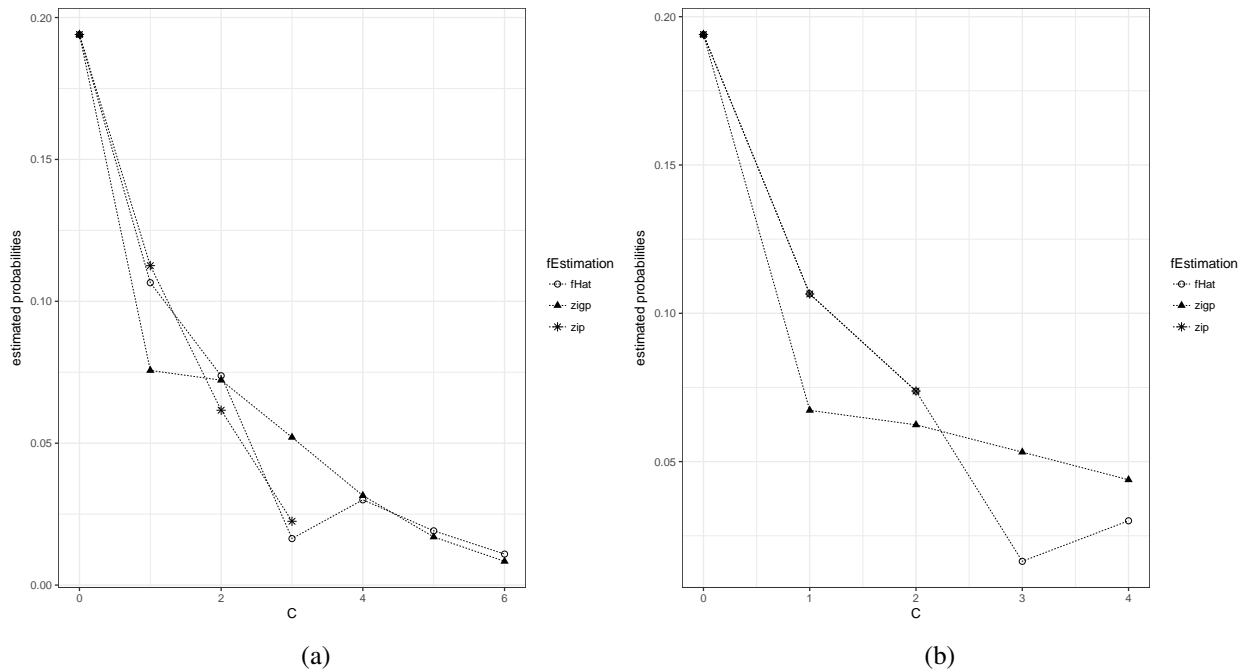

Figure 7: Graphical comparison of  $f$  estimation for cd00031. (7a)  $C_1$  is used for choice of cut-off. (7b)  $C_2$  is used for choice of cut-off.

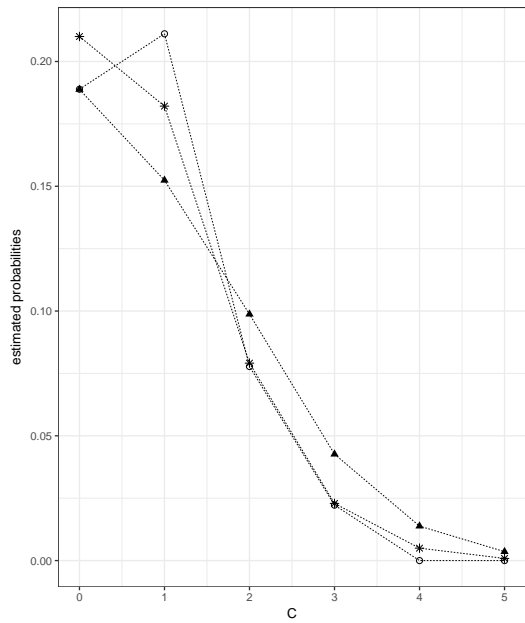

(a)

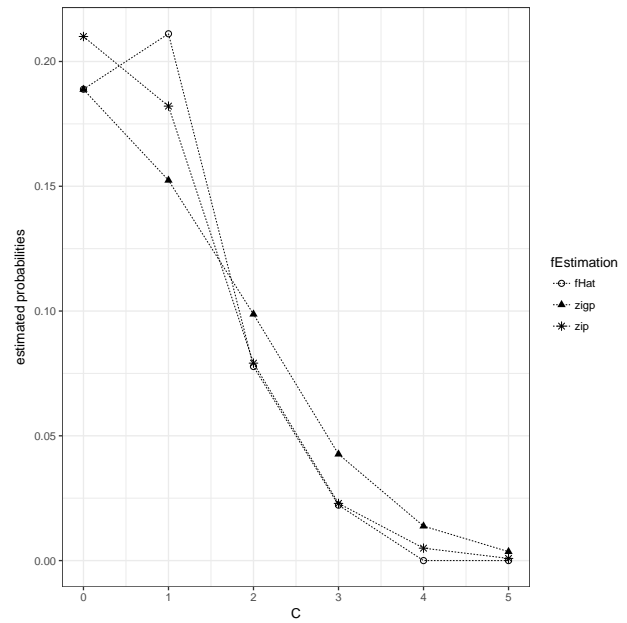

(b)

Figure 8: Graphical comparison of  $f$  estimation for cd00054. (8a)  $C_1$  is used for choice of cut-off. (8b)  $C_2$  is used for choice of cut-off.

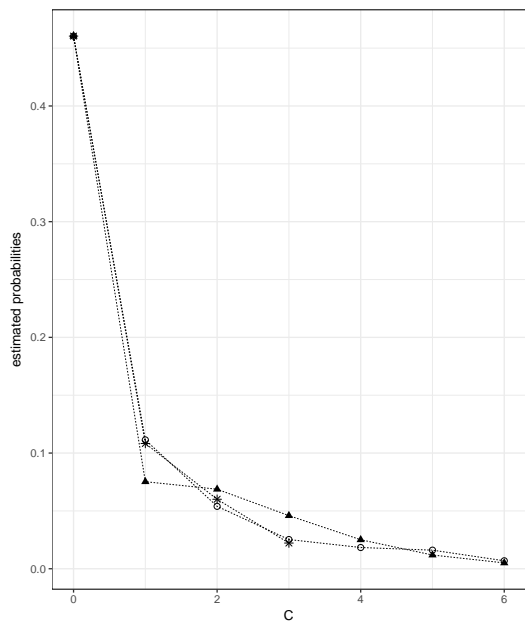

(a)

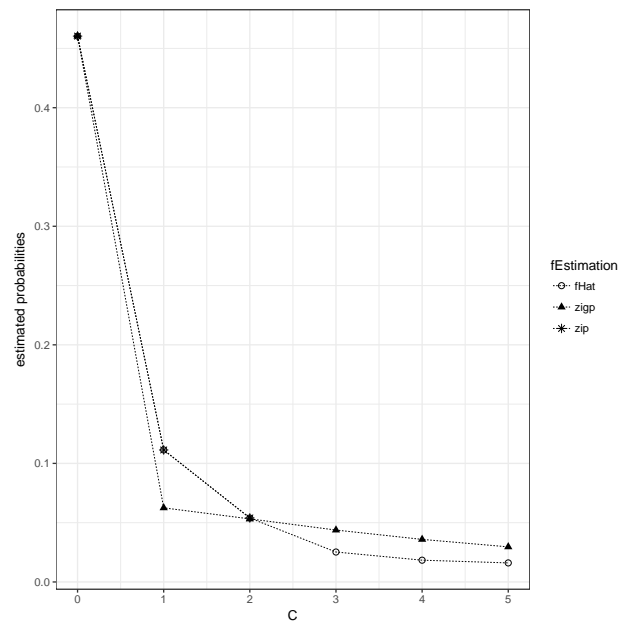

(b)

Figure 9: Graphical comparison of  $f$  estimation for cd00180. (9a)  $C_1$  is used for choice of cut-off. (9b)  $C_2$  is used for choice of cut-off.

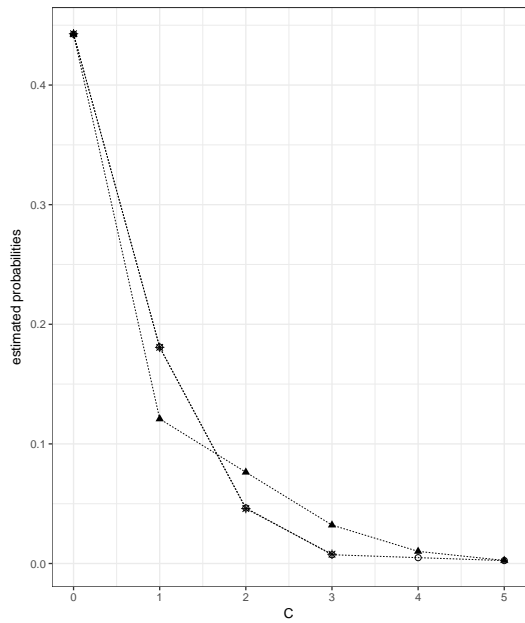

(a)

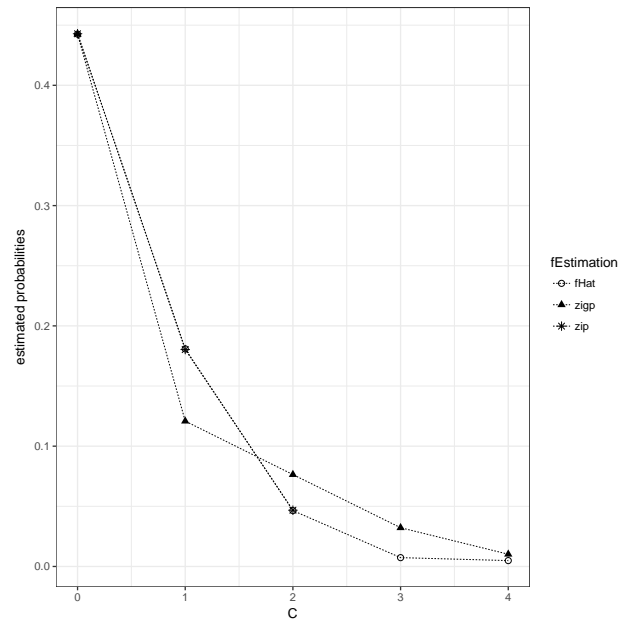

(b)

Figure 10: Graphical comparison of  $f$  estimation for cd00204. (10a)  $C_1$  is used for choice of cut-off. (10b)  $C_2$  is used for choice of cut-off.

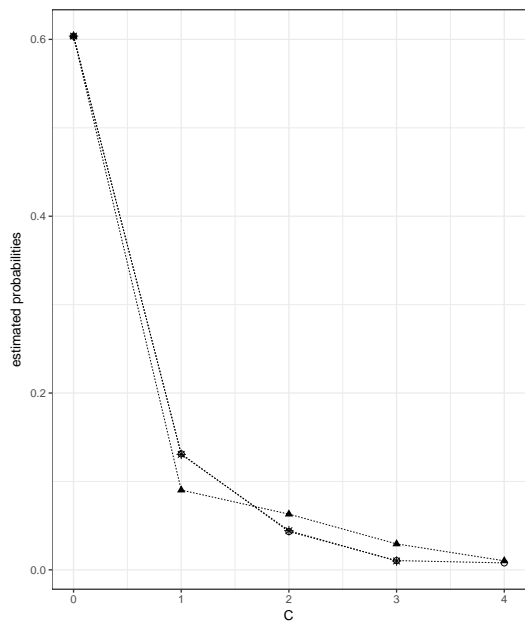

(a)

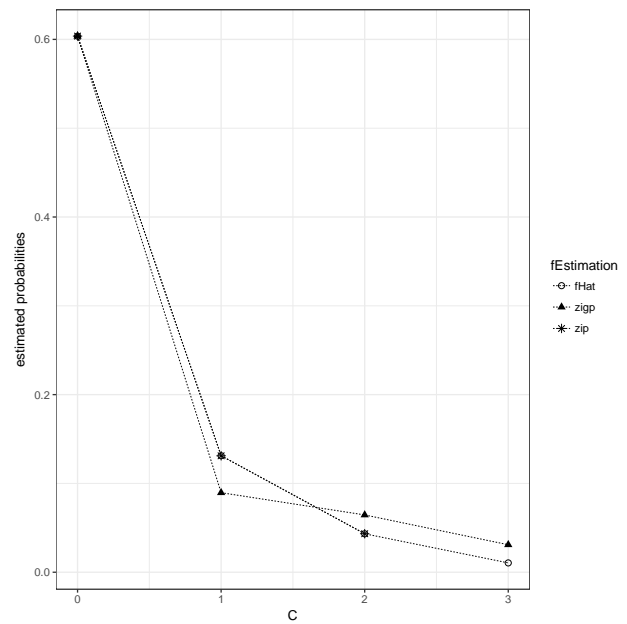

(b)

Figure 11: Graphical comparison of  $f$  estimation for cd00882. (11a)  $C_1$  is used for choice of cut-off. (11b)  $C_2$  is used for choice of cut-off.

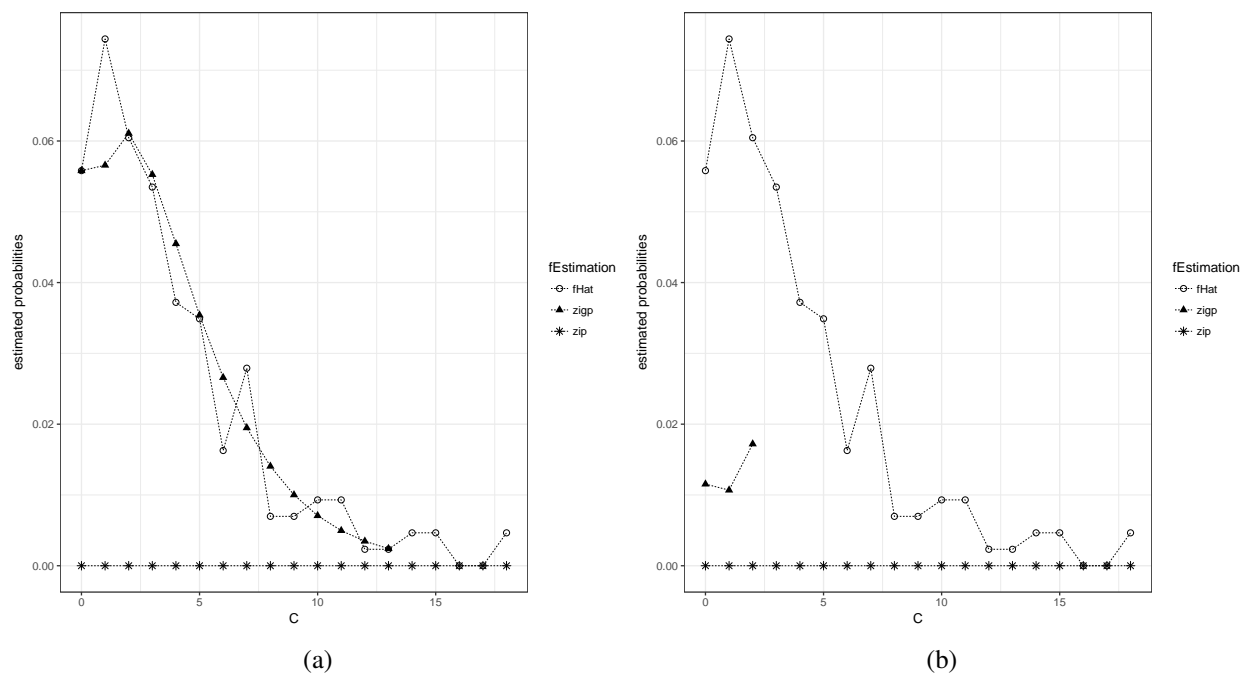

Figure 12: Graphical comparison of  $f$  estimation for pfam00001. (12a)  $C_1$  is used for choice of cut-off. (12b)  $C_2$  is used for choice of cut-off.
